# Supplementary material for: Donor–acceptor based solvent-free organic liquid hybrids with exciplex emission and room temperature phosphorescence
Source: Royal Society of Chemistry journal article supplement (doi:10.1039/d1cc07082g), 2022-01-01
Supplement: d1cc07082g1.pdf [file d1cc07082g1.pdf]

# Exciplex Emission and Room Temperature Phosphorescence from Donor-Acceptor Based Solvent-free Organic Liquid Hybrids

Vivek Chandrakant Wakchare,<sup>a,b</sup> Sairam D. Veer,<sup>a,b</sup> Aakash D. Nidhankar,<sup>a,b</sup> Goudappagouda,<sup>a,b</sup> Rashmi Nayak,<sup>a,b</sup> Kiran Asokan,<sup>a,b</sup> Sapna Ravindranathan,<sup>b,c</sup> Sukumaran Santhosh Babu<sup>\*a,b</sup>

a. Organic Chemistry Division, National Chemical Laboratory (CSIR-NCL), Pune-411008, India.

b. Academy of Scientific and Innovative Research (AcSIR), Ghaziabad-201002, India.

c. Central NMR Facility, National Chemical Laboratory (CSIR-NCL), Dr. Homi Bhabha Road, Pune-411008, India

## Table of Contents

|                   |          |
|-------------------|----------|
| 1. Experimental   | Page S2  |
| 2. Synthesis      | Page S4  |
| 3. Figures S1-S24 | Page S13 |
| 4. Tables S1-S8   | Page S26 |
| 5. References     | Page S34 |

## 1. Experimental

### Materials

All chemicals, 12-Tricosanone, 1-Bromo-2-ethylhexane, Hexane-1-amine, 1-Bromo hexane, Carbazole, 1,8-Naphthalic anhydride, Naphthalene-1,4,5,8-tetracarboxylic dianhydride, Ammonium acetate, Sodium cyanoborohydride, Hydrochloric acid, were purchased from commercial suppliers and used as such without further purification. Solvents such as N,N-dimethylformamide, dichloromethane, methanol, diethyl ether, n-hexane, petroleum ether, ethyl acetate were distilled before use.

Thin-layer chromatography was carried out using Aluchrosep Silica Gel 60/UV254 purchased from Merck Specialities Pvt Ltd and visualized either by UV Fluorescence or by iodine chamber. Column chromatography was performed using silica gel (100-200 mesh). The bed was made using 60-120 mesh silica purchased from Spectrochem Pvt. Ltd. India, and mixtures of DCM-PET used for elution were distilled before use.

### General

All the reactions were carried out in oven-dried round bottom flasks under an argon atmosphere unless otherwise mentioned. The  $^1\text{H}$ ,  $^{13}\text{C}$  NMR spectra were recorded at Bruker-400 MHz NMR spectrometer instrument. The chemical shift values for  $^1\text{H}$  (TMS as internal standard) and  $^{13}\text{C}$  NMR are recorded in  $\text{CDCl}_3$ . The value of the coupling constant ( $J$ ) is stated in Hertz (Hz). High-resolution mass spectra (HRMS) were recorded on a Thermo Scientific Q-Exactive, Accela 1250 pump. UV-Vis absorption spectra were recorded on SHIMADZU UV-3600 plus UV-VIS-NIR spectrophotometer, while all emission spectra were performed using PTI Quanta Master™ Steady State Spectrofluorometer. Fluorescence lifetimes were measured by time-correlated single-photon counting (TCSPC), using a spectrofluorometer (Horiba Scientific), and an LED excitation source is 374 nm. The quality of the fit has been judged by fitting parameters such as  $\chi^2$  (<1.2) as well as visual inspection of the residuals. Phosphorescence spectra were recorded using Fluorolog-3 HORIBA JOBIN VYON spectrophotometer. DSC Q 10 differential scanning calorimeter connected to Q Series PCA (TA Instruments, USA) was used to determine the phase transition temperatures of the molecule. TGA data were collected in METTLER TOLEDO, TGA/SDTA851 instrument. The rheology experiment was carried out using an MCR dynamic oscillatory Cup and Bob Frequency Sweep at 20 °C using about 5 ml of the liquid samples. Luminescence quantum yield was measured using a Quanta-Phi 6" model F-3029. HPLC analysis is performed on

Agilent 1260, Infinity Series using normal (Zweite silica, 5  $\mu\text{m}$ , 4.6 x 250 mm) and reverse-phase (Shimadzu, Shim-pack GIST, 5  $\mu\text{m}$ , C18, 4.6 x 250 mm) columns.

### **Preparation of EL and RTPL**

The donor and acceptor with different equivalents in glass vials (1.5 mL) were either stirred well with a spatula or heated gently to become a homogeneous mixture.

### **UV-VIS Spectra of Neat Liquids**

UV-Vis spectra of all neat liquids were recorded in the transmittance mode, and the samples were prepared by making a uniform, transparent coating of 5 mg sample on a 1 x 1 cm<sup>2</sup> area of quartz plate. The consistency of each spectrum was confirmed by repeated trials.

### **NMR Experiments**

All the NMR spectra in the neat condition were recorded by placing the compounds (~ 200 mg) in a 3 mm NMR tube and inserting it in an outer 5 mm NMR tube containing *DMSO-d*<sub>6</sub> as an external lock. The actual ratios of donor and acceptor were estimated by integrating peak areas of the aromatic protons. Solution state NMR was recorded by dissolving 12 mg of the compound in 0.6 mL of solvent.

### **Phosphorescence Experiments**

All phosphorescence experiments have been done in the air by keeping the same experimental parameters. The window of maximum delay after flash for phosphorescence measurements was kept 0.5 ms.

## 2. Synthesis

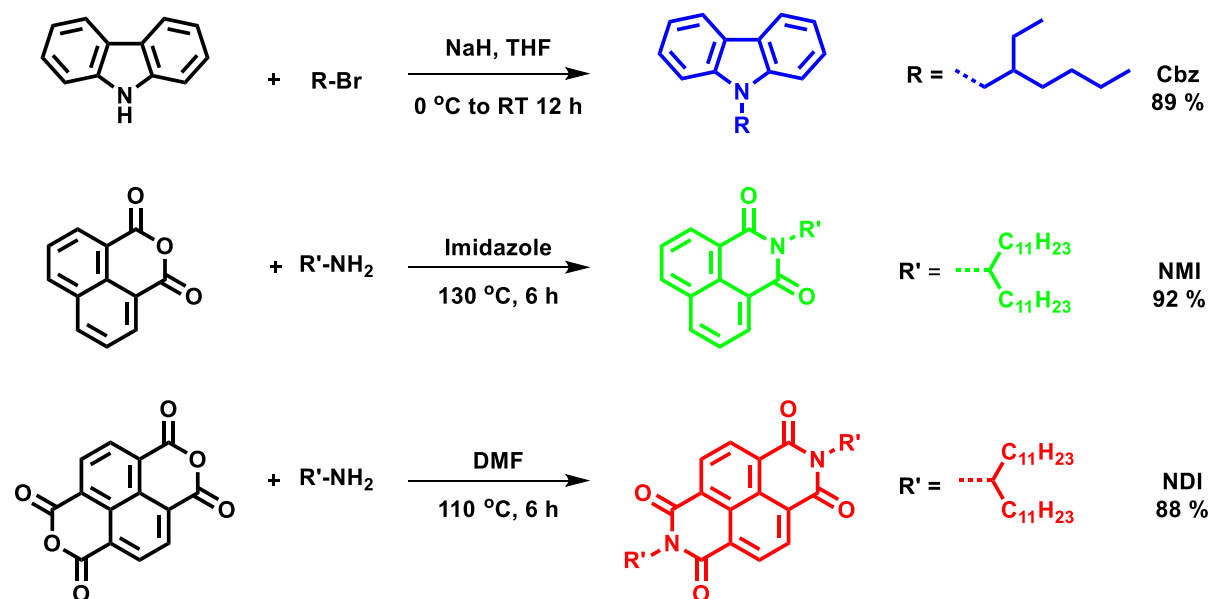

**Scheme S1.** Synthesis of Cbz, NMI, and NDI.

### Synthesis of 9-(2-ethylhexyl)-9H-carbazole (Cbz)<sup>S1</sup>

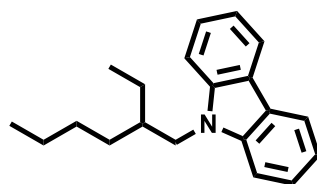

In a two-neck round, the bottom flask was placed carbazole (1 eq.), bromoalkane (1.1 eq.), KOH (1.1 eq.), TBAB (tetrabutylammonium bromide, 0.1 eq.), and DMF (50 mL). The obtained mixture was stirred at 70 °C for 24 hours. After cooling down, water and chloroform were added (each 100 mL) and thoroughly shaken. The organic layer was separated, and the inorganic layer was extracted again with chloroform (100 mL). Combined organic extracts were washed with water (100 mL), two times with NaCl saturated solution (2 x 100 mL), and finally dried with anhydrous Na<sub>2</sub>SO<sub>4</sub>. Yellowish oil was subjected to column chromatography on silica gel, using petroleum ether as a mobile phase to get the product.

**Nature and Yield:** colourless liquid, 89%.

**<sup>1</sup>H-NMR:** (400 MHz, CDCl<sub>3</sub>, 25 °C):  $\delta$  = 8.12-8.07 (2H, m), 7.50-7.36 (4H, m), 7.25-7.17 (2H, m), 4.19-4.17 (4H, m), 2.12-2.04 (1H, m), 1.42-1.24 (8H, m), 1.37-1.34 (8H, m), 0.93-0.82 (6H, m) ppm.

**$^{13}\text{C}$ -NMR:** (100 MHz,  $\text{CDCl}_3$ , 25 °C):  $\delta$  = 140.91, 125.89, 122.76, 120.24, 118.63, 108.92, 47.38, 39.38, 31.00, 28.81, 24.39, 23.04, 14.01, 10.89 ppm.

**HR-MS:** calcd. for  $\text{C}_{20}\text{H}_{25}\text{N}$  = 279.1987, found 279.1982.

### Tricosan-12-amine

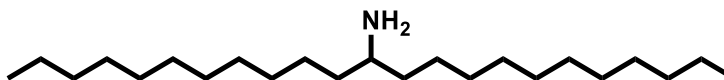

1,2-Tricosanone,  $\text{NH}_4\text{OAc}$  and  $\text{NaBH}_3\text{CN}$  were dissolved in 40 mL methanol (HPLC grade) and stirred at RT for 56 h (3 days). Then the reaction was quenched by adding con. HCl dropwise. The solution was then concentrated with the rotatory evaporator. The solid thus obtained is dispersed in 250 mL of water and adjusted to  $\text{pH} = 10$  with KOH. The obtained latex solution was evaporated by 150 mL of  $\text{CH}_2\text{Cl}_2$  and then 100 mL again. The pale yellow oil was obtained by concentrating the  $\text{CH}_2\text{Cl}_2$  solution and used as such for the next step without further purification.

### Synthesis of 2-(Tricosan-12-yl)-1H-benzo[de]isoquinoline-1,3(2H)-dione (NMI)<sup>S2</sup>

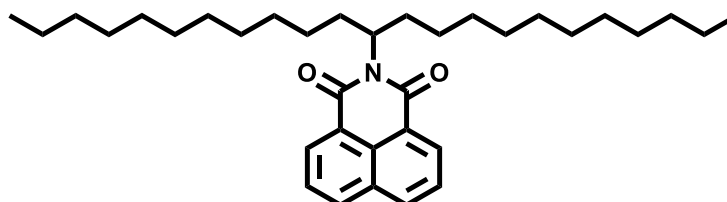

Tricosan-12-amine (1.05 eq.) and 1,8-naphthalic anhydride (1 eq.) were heated in imidazole (10 g) for 6 hours at 130 °C, subsequently cooled, and while still warm combined with a 2 M HCl followed by extraction with  $\text{CH}_2\text{Cl}_2$  twice. The combined organic phases were dried with ( $\text{Na}_2\text{SO}_4$ ), the solvent was removed by vacuum, and the product was purified by column chromatography.

**Nature and Yield:** pale yellow liquid, 92%.

**$^1\text{H}$  NMR:** ( $\text{CDCl}_3$ , 400 MHz, 25 °C):  $\delta$  = 8.60-8.57 (2H, m), 8.19 (2H, d,  $J$  = 8.3 Hz), 7.76 (2H, t,  $J$  = 8.3 Hz), 5.25-5.13 (1H, m), 2.30-2.15 (2H, m), 1.91-1.75 (2H, m), 1.28-1.20 (36H, m), 0.86 (6H, t,  $J$  = 6.18 Hz) ppm.

**$^{13}\text{C}$  NMR:** ( $\text{CDCl}_3$ , 100 MHz, 25.0 °C):  $\delta$  = 165.4, 164.3, 133.5, 131.5, 131.5, 130.8, 128.3, 126.9, 123.4, 123.7, 54.4, 32.4, 31.8, 29.5, 29.5, 29.2, 26.9, 22.6, 14.1 ppm.

**HRMS:** calcd. for  $C_{35}H_{53}NO_2^+$  = 519.4076, found 519.4071.

**Synthesis of 2,7-Di(tricosan-12-yl)benzo[lmn][3,8]phenanthroline-1,3,6,8(2H,7H)-tetraone (NDI)<sup>S3</sup>**

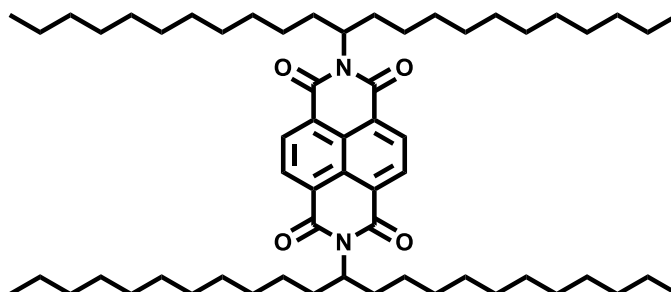

Naphthalene-1,4,5,8-tetracarboxylic dianhydride (1 eq.) and tricosan-12-amine (2.5 eq.) were suspended in DMF (20 mL) in 100 mL round bottom flask. The reaction mixture was stirred for 6 h at 140 °C. The progress of the reaction was monitored by TLC. After completion of the reaction, the reaction mixture was allowed to cool to RT, and it was quenched by the addition of hydrochloric acid (2N, 40 mL). The reaction mixture was extracted with dichloromethane (3 × 200 mL). The organic layer was dried over sodium sulfate, and the solvent was removed under reduced pressure. The crude product was purified by silica gel column chromatography by using 50% dichloromethane in petroleum ether as eluent. The combined organic layer was concentrated under reduced pressure and dried under vacuum to get the product.

**Nature and Yield:** solid, 88 %.

**<sup>1</sup>H-NMR** (500 MHz, CDCl<sub>3</sub>, 25 °C):  $\delta$  = 8.73 (4H, s), 5.21-5.12 (2H, m), 2.24-2.17 (4H, m), 1.87-1.78 (4H, m), 1.33-1.19 (72H, m), 0.85 (12H, t,  $J$  = 6.8 Hz) ppm.

**<sup>13</sup>C-NMR** (125 MHz, CDCl<sub>3</sub>, 25 °C):  $\delta$  = 164.1, 162.9, 131.3, 130.6, 126.8, 55.2, 32.3, 31.9, 29.6, 29.5, 29.3, 26.9, 22.7, 14.1 ppm.

**HR-MS:** calcd. for  $C_{60}H_{98}N_2O_4$  = 910.7527, found 910.7521.

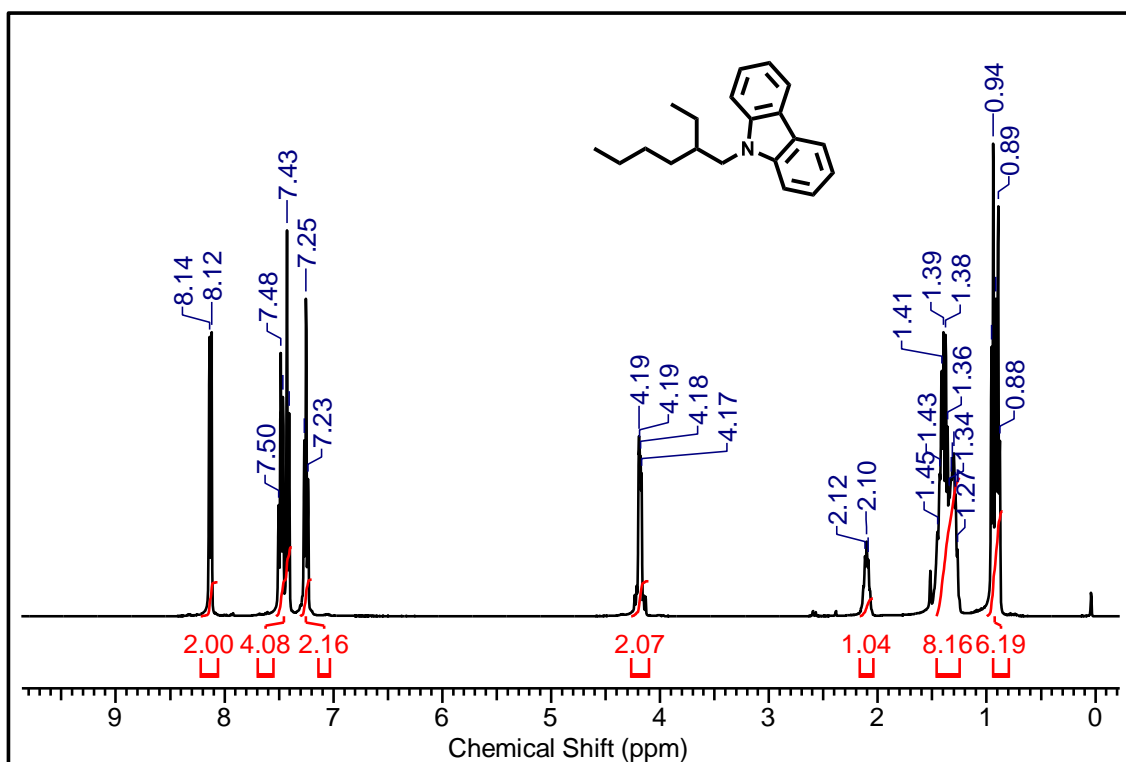

<sup>1</sup>H NMR spectra of 9-(2-ethylhexyl)-9H-carbazole (**Cbz**).

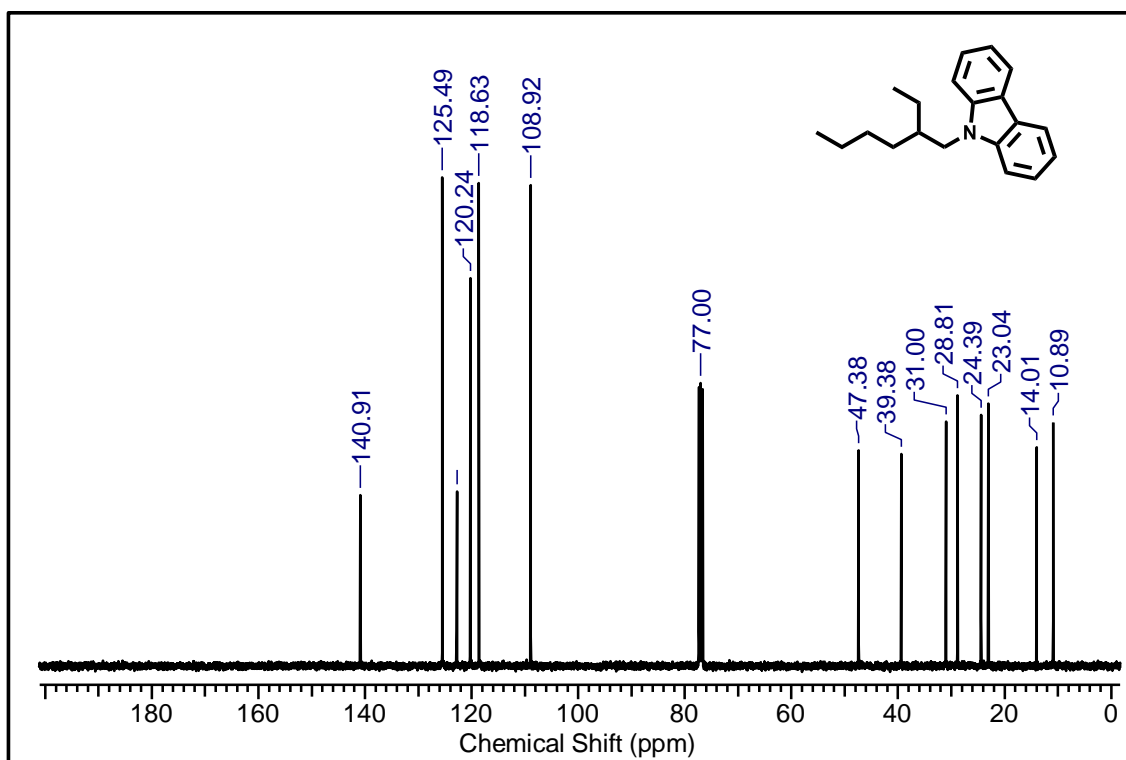

<sup>13</sup>C NMR spectra of 9-(2-ethylhexyl)-9H-carbazole (**Cbz**).

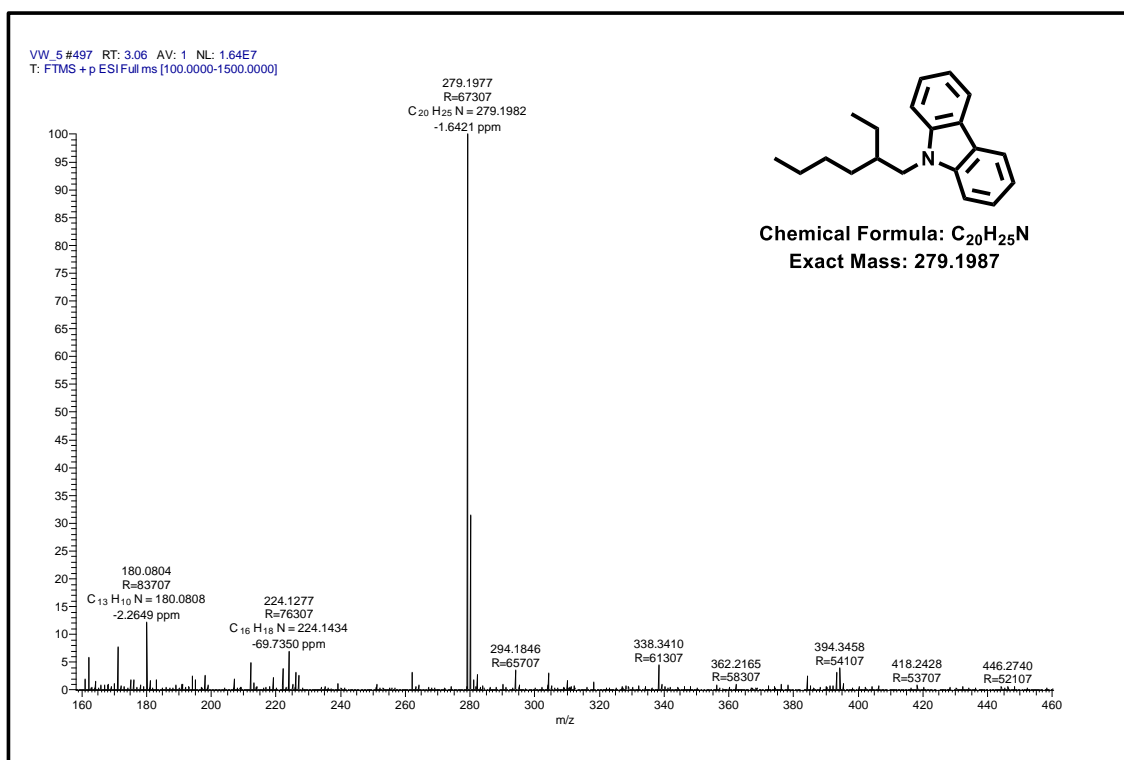

HRMS of 9-(2-ethylhexyl)-9H-carbazole (**Cbz**).

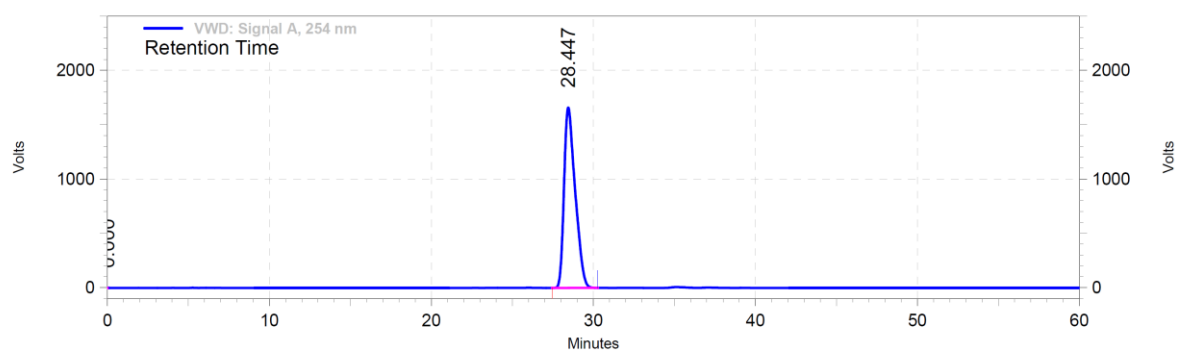

HPLC profile of **Cbz** (RT = 28.447), in acetonitrile:H<sub>2</sub>O (90:10) by monitoring at 254 nm.

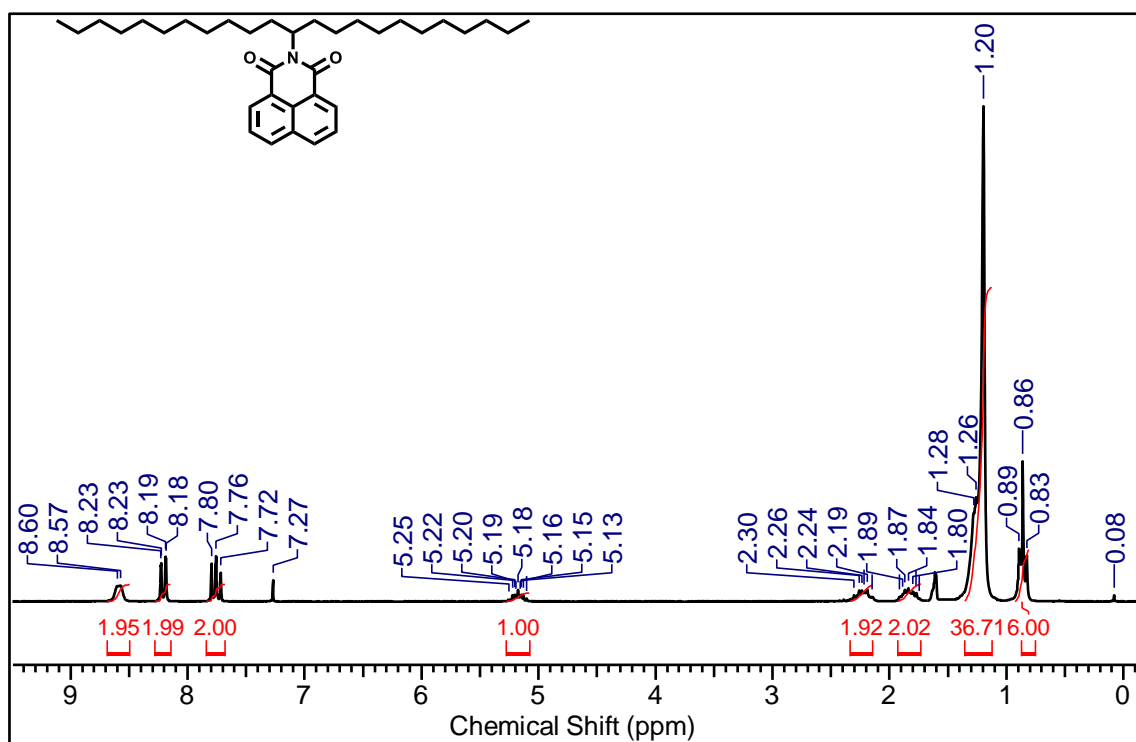

<sup>1</sup>H NMR spectra of 2-(tricosan-12-yl)-1H-benzo[de]isoquinoline-1,3(2H)-dione (**NMI**).

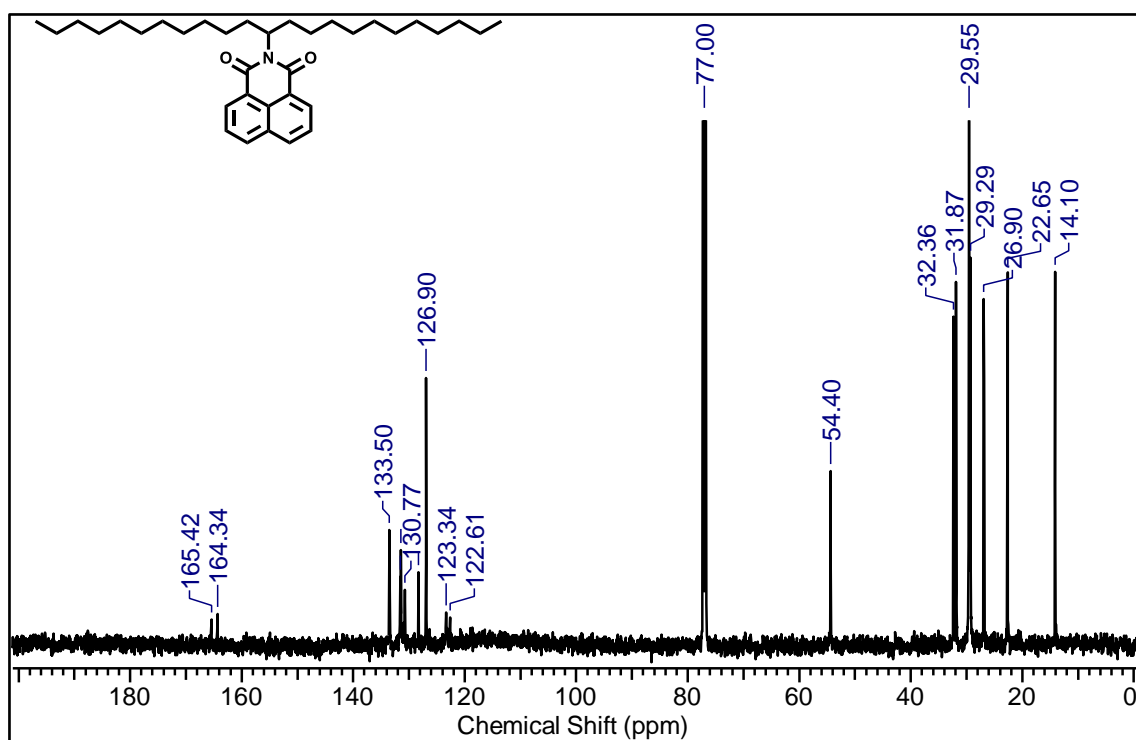

<sup>13</sup>C NMR spectra of 2-(tricosan-12-yl)-1H-benzo[de]isoquinoline-1,3(2H)-dione (**NMI**).

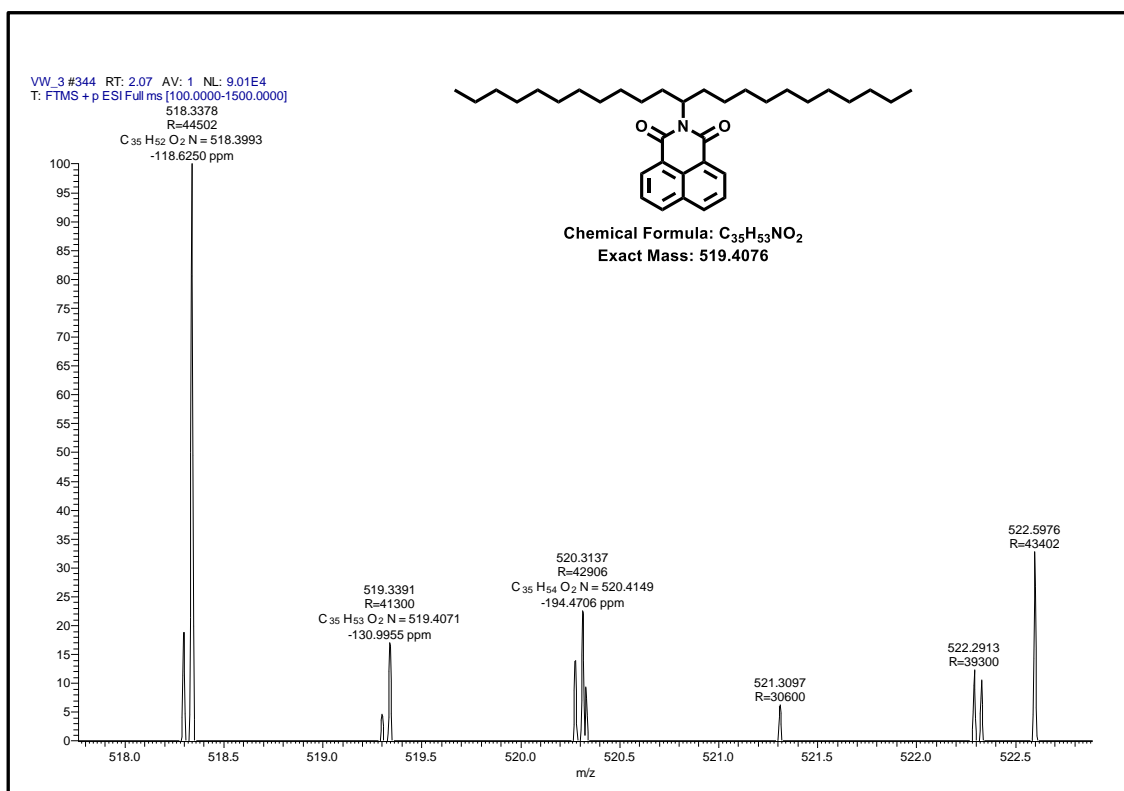

HRMS of 2-(tricosan-12-yl)-1H-benzo[de]isoquinoline-1,3(2H)-dione (**NMI**).

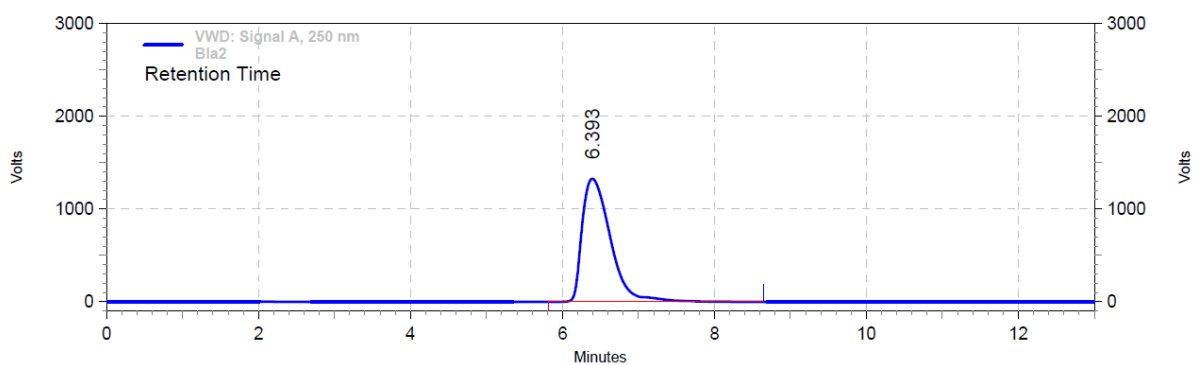

HPLC profile of **NMI** (RT = 6.393) in *n*-hexane:isopropanol (95:05) by monitoring at 254 nm.

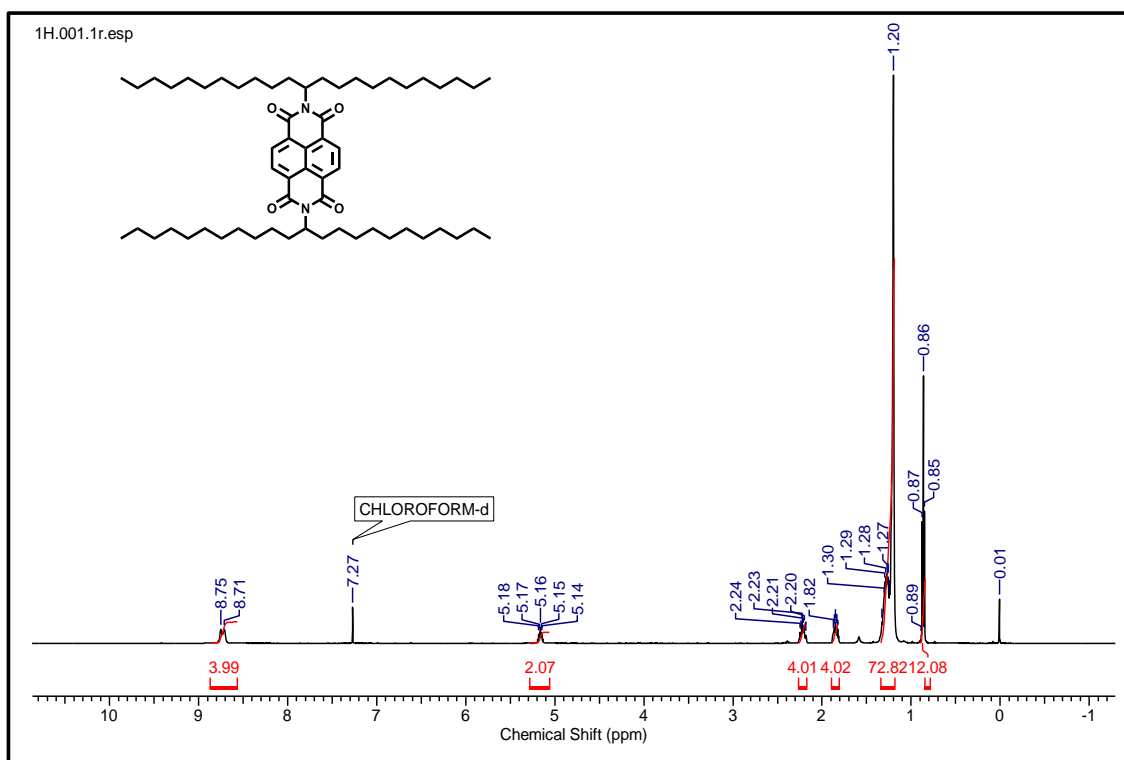

$^1\text{H}$  NMR spectra of 2,7-di(tricosan-12-yl)benzo[lmn][3,8]phenanthroline-1,3,6,8(2H,7H)-tetraone (**NDI**).

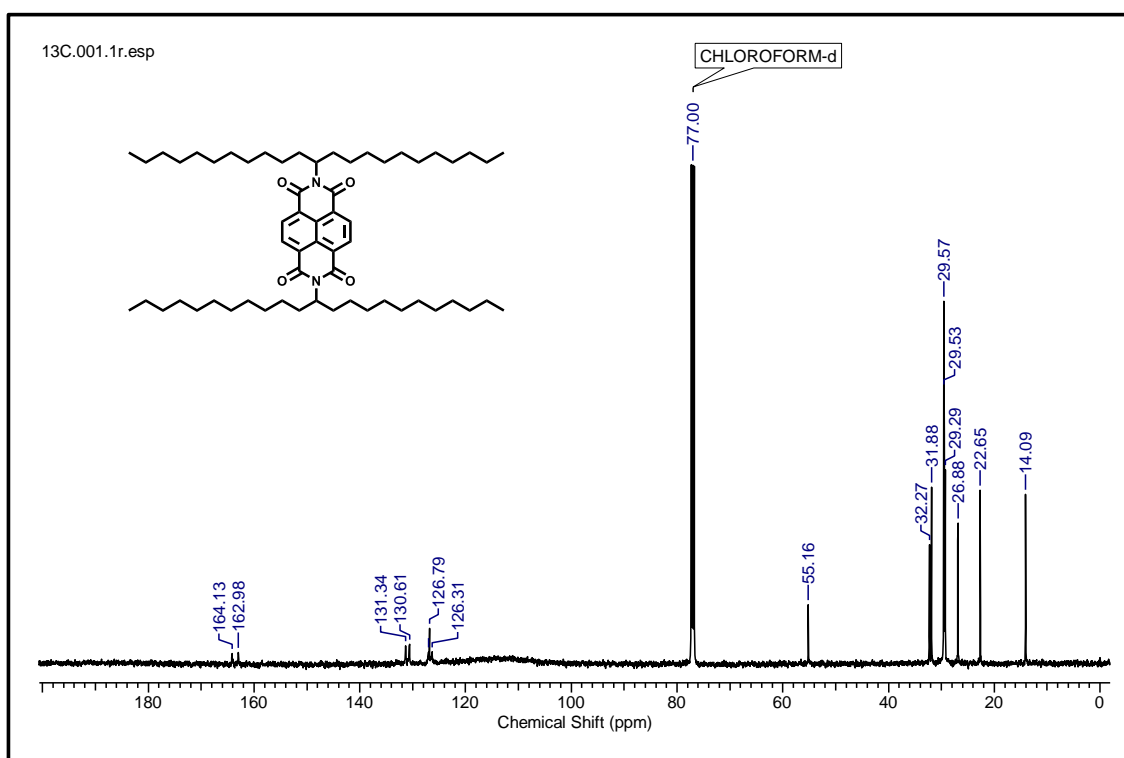

$^{13}\text{C}$  NMR spectra of 2,7-di(tricosan-12-yl)benzo[lmn][3,8]phenanthroline-1,3,6,8(2H,7H)-tetraone (**NDI**).

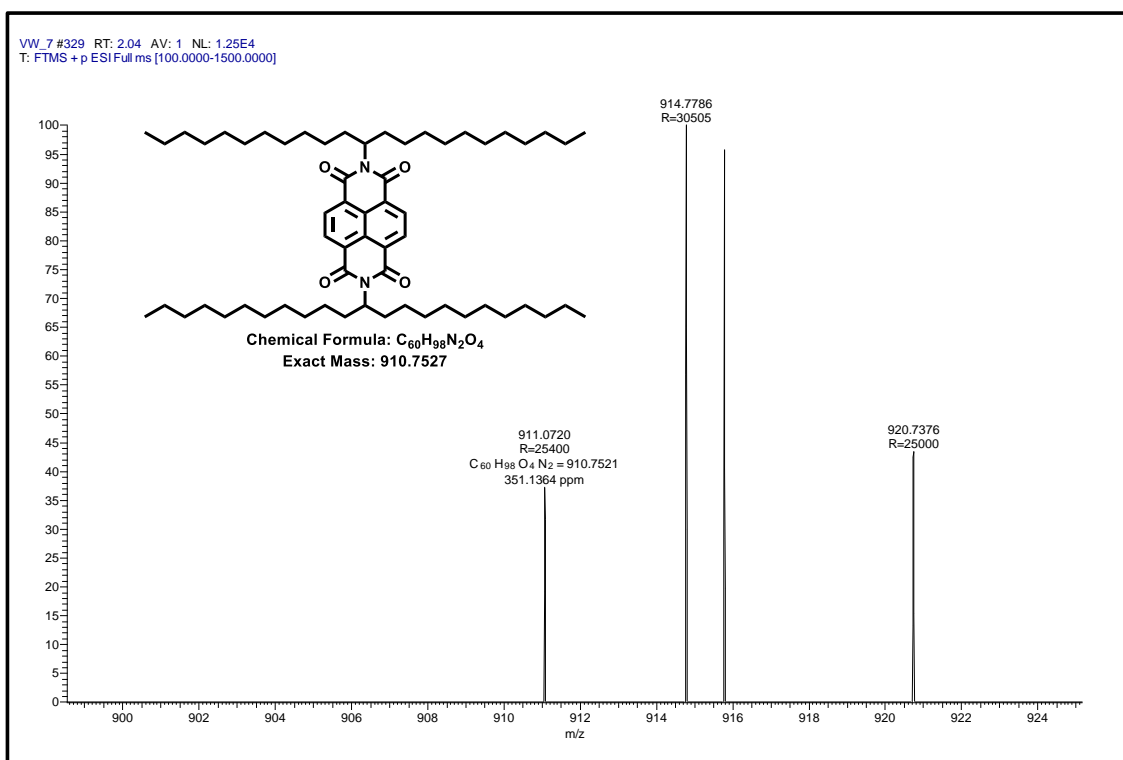

HRMS of 2,7-di(tricosan-12-yl)benzo[lmn][3,8]phenanthroline-1,3,6,8(2H,7H)-tetraone (**NDI**).

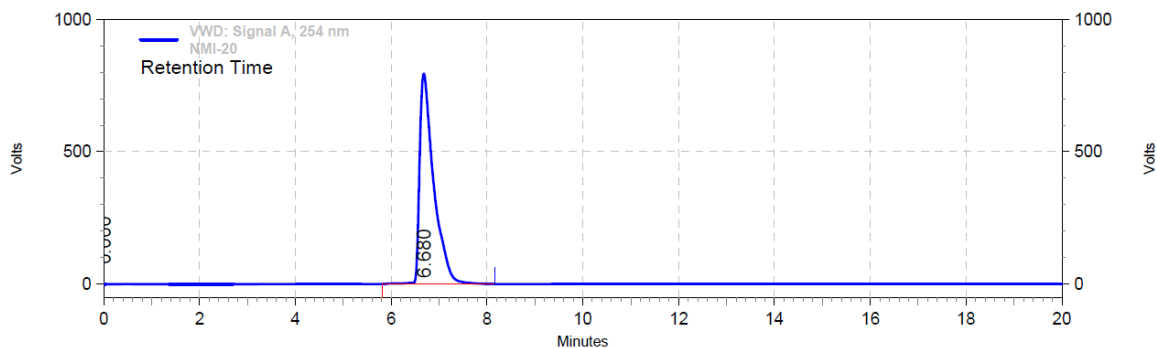

HPLC profile of **NDI** (RT = 6.68) in *n*-hexane:isopropanol (95:05) by monitoring at 254 nm.

CHN analysis of **Cbz**, **NMI**, **NDI**.

| Compound   | Chemical Formula:    | Elemental Analysis: Theoretical |       |      | Elemental Analysis: Found |               |              |
|------------|----------------------|---------------------------------|-------|------|---------------------------|---------------|--------------|
|            |                      | C                               | H     | N    | C                         | H             | N            |
| <b>Cbz</b> | $C_{20}H_{25}N$      | 85.97                           | 9.02  | 5.01 | 86.21 (+0.24)             | 8.70 (-0.32)  | 5.40 (+0.39) |
| <b>NMI</b> | $C_{35}H_{53}NO_2$   | 80.87                           | 10.28 | 2.69 | 80.91 (+0.04)             | 9.86 (-0.42)  | 3.17 (+0.48) |
| <b>NDI</b> | $C_{60}H_{98}N_2O_4$ | 79.07                           | 10.84 | 3.07 | 79.56 (+0.49)             | 10.45 (-0.39) | 2.71 (-0.36) |

\*The deviation of experimental value from the theoretical value is provided in bracket.

### 3. Figures

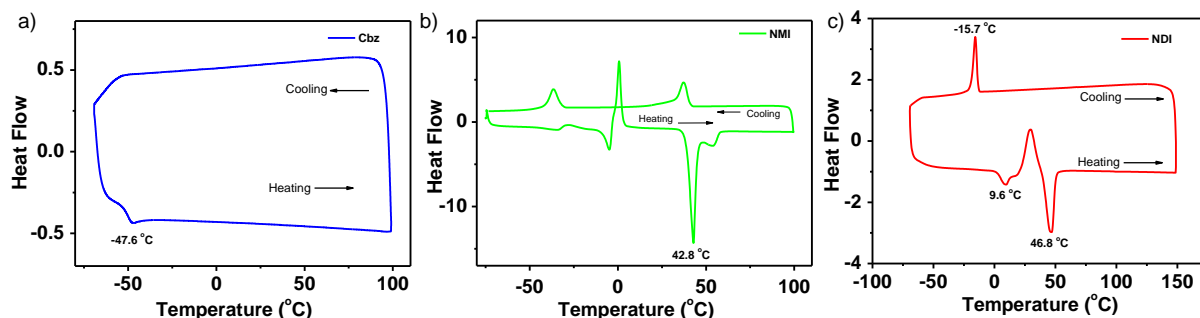

**Figure S1.** DSC thermograms in the heating trace at a scanning rate of 10 °C/min of a) **Cbz**, b) **NMI**, c) **NDI**.

*Cbz* is a colourless free-flowing liquid at RT (30 °C) and exhibits a glass transition temperature ( $T_g$ , offset) around -47 °C as confirmed by differential scanning calorimetry (DSC). The acceptors **NMI** and **NDI** are low melting solids with a melting point ( $T_m$ ) around 42 °C and 46 °C, respectively.

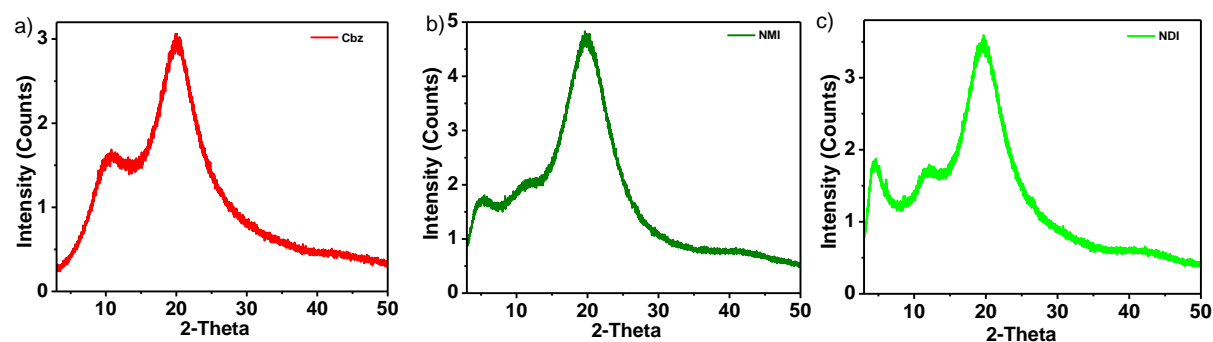

**Figure S2.** Comparison of PXRD pattern of **Cbz**, **NMI**, and **NDI**.

The powder X-Ray diffraction (XRD) pattern shows that **Cbz**, **NMI**, and **NDI** lack crystalline ordering, however sharp peaks have been observed for other solid derivatives.

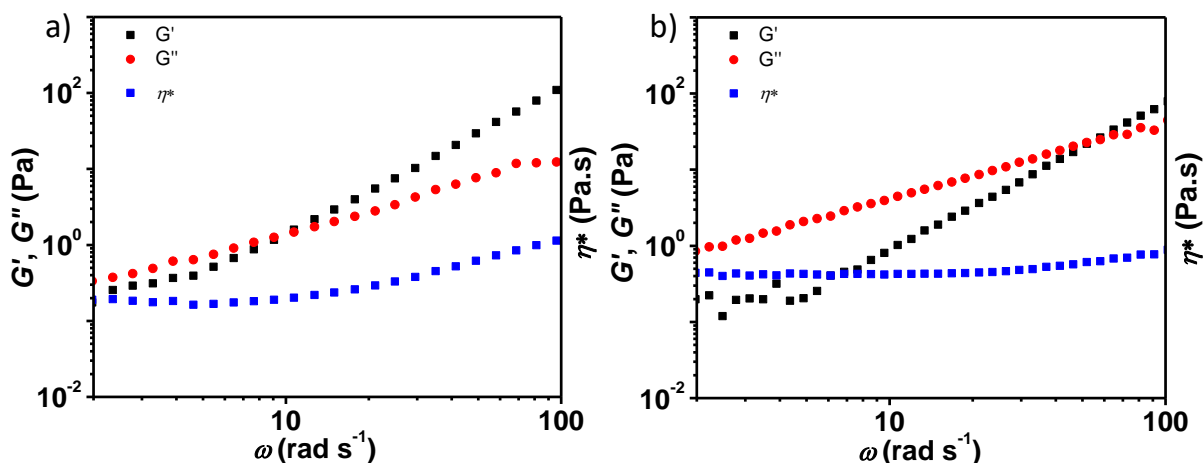

**Figure S3.** Variation of storage modulus ( $G'$ ) (■), loss modulus ( $G''$ ) (●), and complex viscosity ( $\eta^*$ ) (■) versus angular frequency on a double logarithmic scale, of a) **Cbz** and, b) **NMI**.

Rheology experiments revealed that **Cbz** and **NMI** show viscous to elastic transition from low to high angular frequency. Both derivatives transform from solvent-free liquid to a semi-solid material with a gradual increase of frequency, indicating the characteristics of shear-hardening. Moreover, **Cbz** shows a lower ( $\sim 10 \text{ rad s}^{-1}$ ) modulus intersection point ( $G'$ ) compared to **NMI** ( $\sim 20 \text{ rad s}^{-1}$ ).

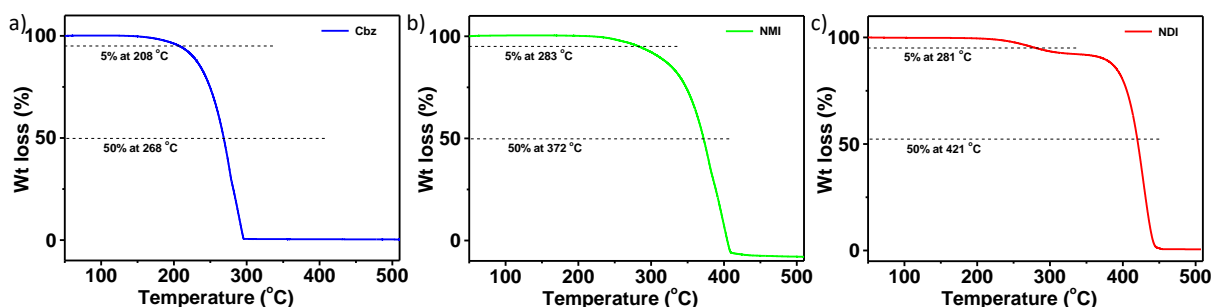

**Figure S4.** TGA of a) **Cbz**, b) **NMI**, and c) **NDI**.

The thermal stability of all the molecules was checked by thermogravimetric analysis (TGA). It has been found that 5% weight loss was noticed at around 210 °C for **Cbz**. While for acceptors, it was varied as 283 °C (**NMI**), and 281 °C (**NDI**).

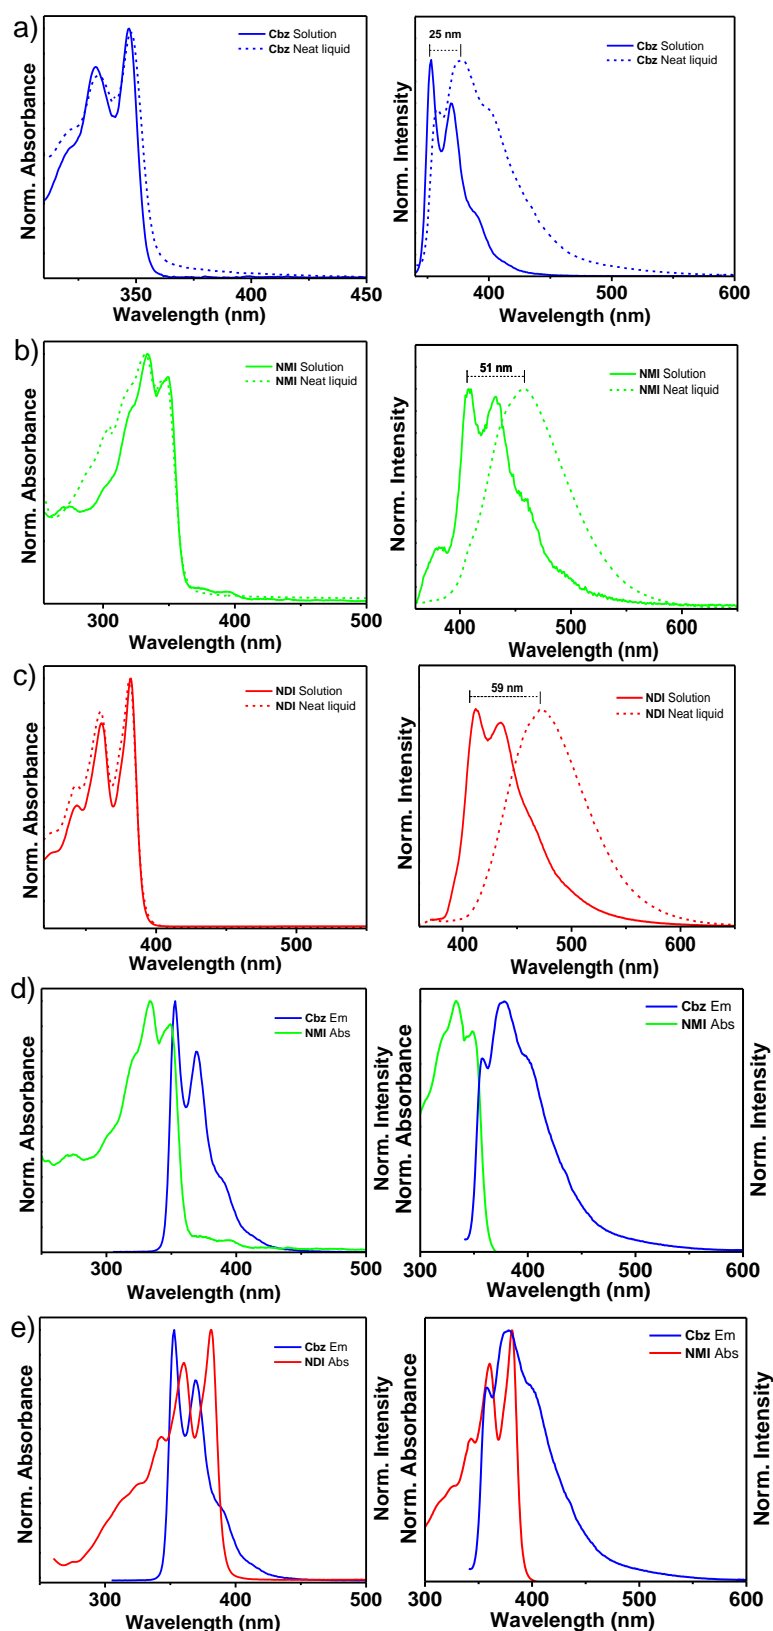

**Figure S5.** Normalized absorption (left) and emission (right) spectra of a) **Cbz**, b) **NMI**, c), and **NDI** in dichloromethane (solid line) and neat liquid thin film (dotted line), ( $\lambda_{\text{ex}} = 342$  nm for **Cbz**; 350 nm for **NMI**; and 360 nm for **NDI**,  $C = 1 \times 10^{-5}$  M,  $l = 1$  mm). Spectral overlap between d) emission of **Cbz** and the absorption of **NMI** in solution (left) and neat liquid thin film (right) and e) emission of **Cbz** and the absorption of **NDI** in solution (left) and neat liquid thin film (right).

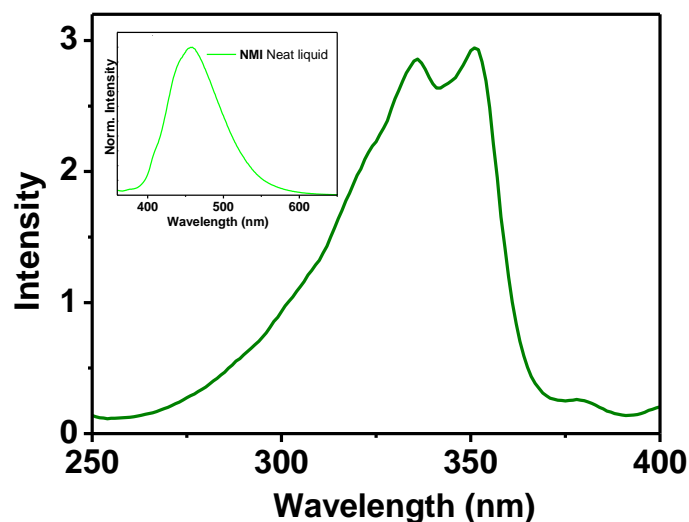

**Figure S6.** Excitation spectrum monitored at the major emission peak of NMI in the neat liquid state; insets show the corresponding emission spectra of neat liquid thin-film ( $\lambda_{\text{ex}} = 250\text{-}450\text{ nm}$  and  $\lambda_{\text{mon}} = 460\text{ nm}$ ).

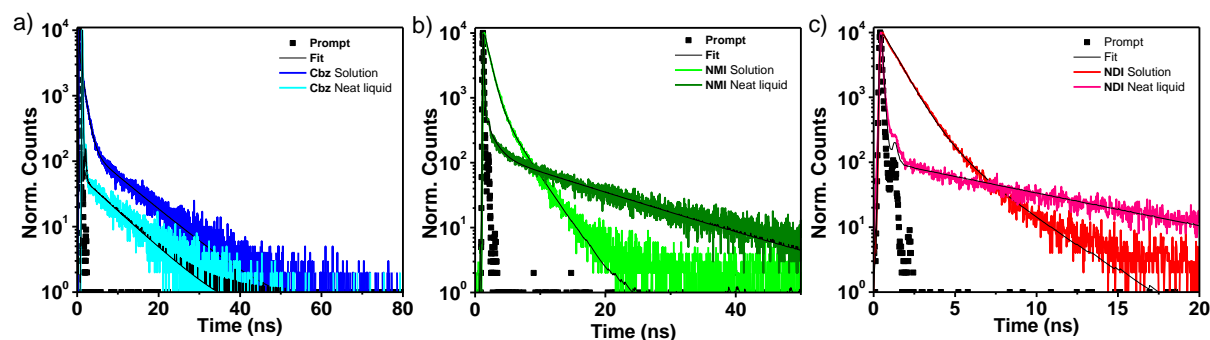

**Figure S7.** Emission lifetime decay profile of a) **Cbz** ( $\lambda_{\text{mon}} = 390\text{ nm}$ ), b) **NMI** ( $\lambda_{\text{mon}} = 410\text{ nm}$ ), c) **NDI** ( $\lambda_{\text{mon}} = 412\text{ nm}$ ) in dichloromethane at  $25\text{ }^{\circ}\text{C}$  ( $\lambda_{\text{ex}} = 374\text{ nm}$ ,  $C = 0.01\text{ mM}$ ,  $l = 1\text{ mm}$ ) and in neat liquid thin films at  $25\text{ }^{\circ}\text{C}$ , for **Cbz**  $\lambda_{\text{mon}} = 410\text{ nm}$ , **NMI**  $\lambda_{\text{mon}} = 460\text{ nm}$ , **NDI**  $\lambda_{\text{mon}} = 472\text{ nm}$ ,  $\lambda_{\text{ex}} = 374\text{ nm}$ .

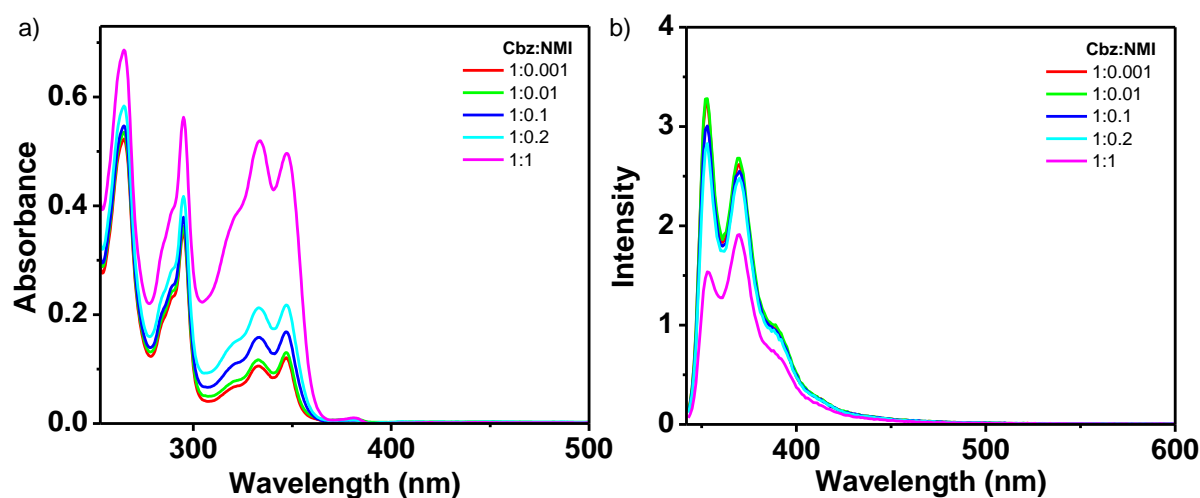

**Figure S8.** Variation of absorption and emission spectra of **Cbz:NMI** with an increasing equivalents of **NMI** in dichloromethane solution ( $l = 1\text{ cm}$ ,  $C = 1 \times 10^{-5}\text{ M}$ ,  $\lambda_{\text{ex}} = 333\text{ nm}$ ).

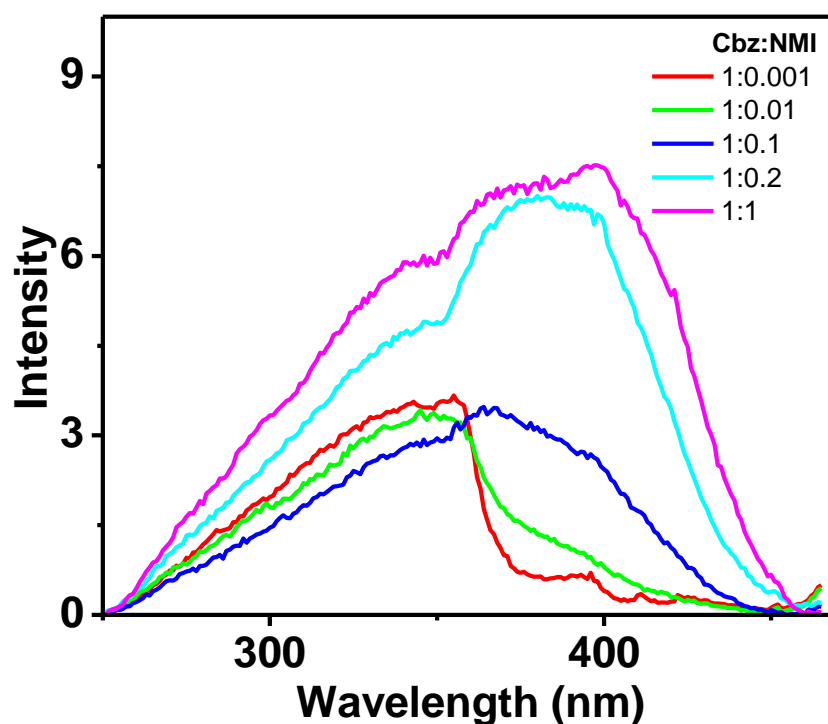

**Figure S9.** Variation of excitation spectra of **Cbz:NMI** with an increasing equivalents of **NMI** in the neat liquid thin film ( $\lambda_{\text{ex}} = 250\text{-}480\text{ nm}$ ,  $\lambda_{\text{mon}} = 485\text{ nm}$ ).

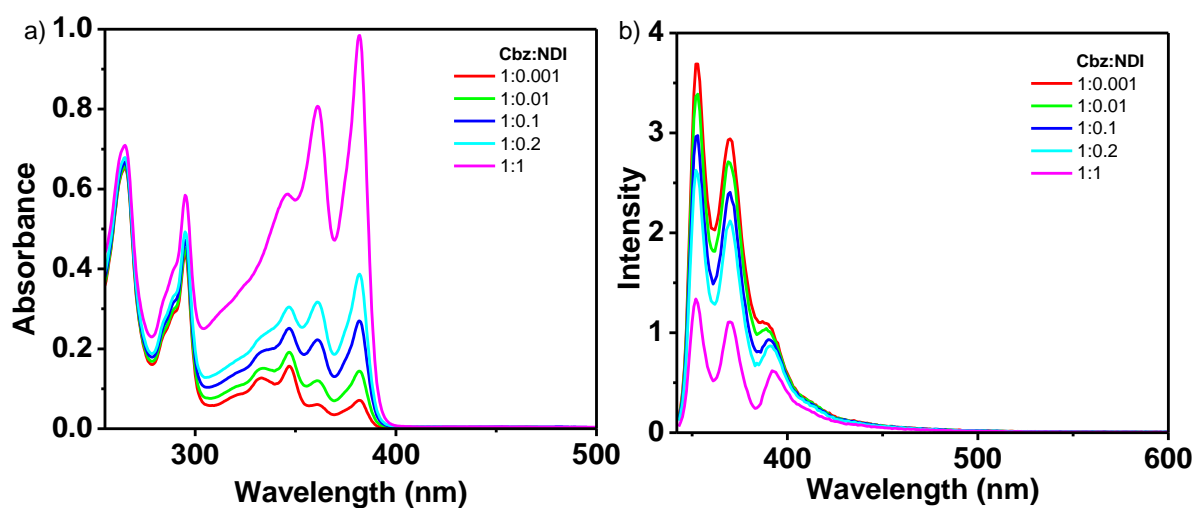

**Figure S10.** Variation of absorption and emission spectra of **Cbz:NDI** with an increasing equivalents of **NDI** in dichloromethane solution ( $l = 1\text{ cm}$ ,  $C = 10^{-5}\text{ M}$ ,  $\lambda_{\text{ex}} = 333\text{ nm}$ ).

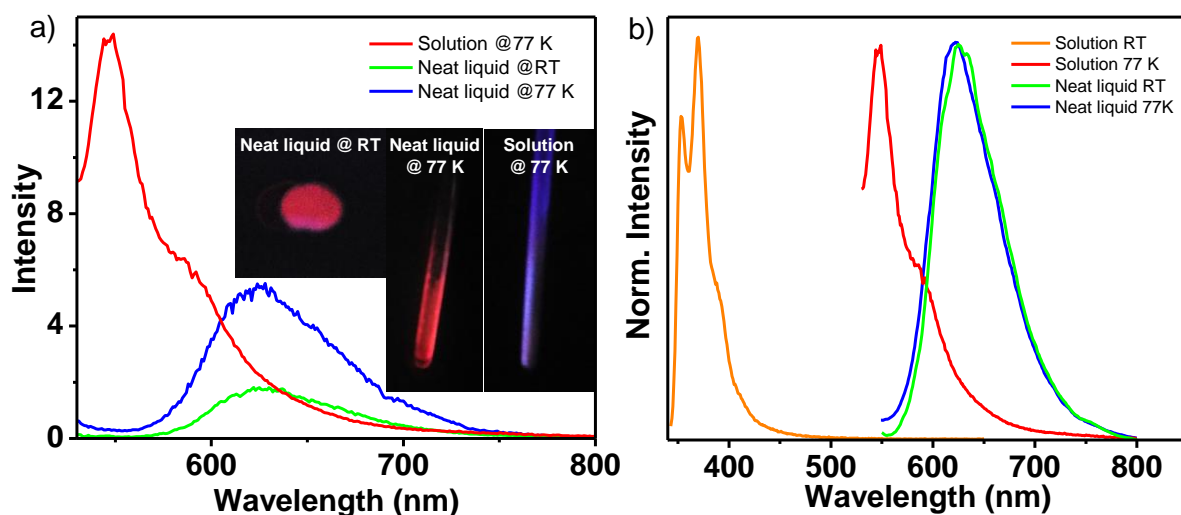

**Figure S11.** a) Comparison of the emission spectra of **Cbz:NDI** (1:1) in the solution at 77 K, neat liquid at RT and 77 K, inset shows the photographs and b) corresponding normalised spectra along with solution state emission at RT.

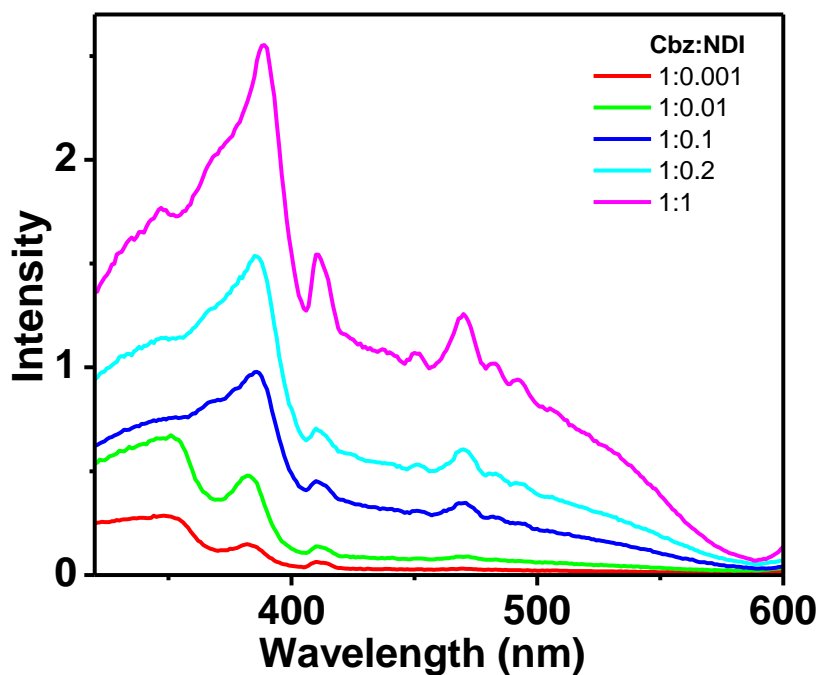

**Figure S12.** Variation of excitation spectra of **Cbz:NDI** with an increasing equivalents of **NDI** in the neat liquid thin film ( $\lambda_{\text{ex}} = 320\text{-}600\text{ nm}$ ,  $\lambda_{\text{mon}} = 620\text{ nm}$ ).

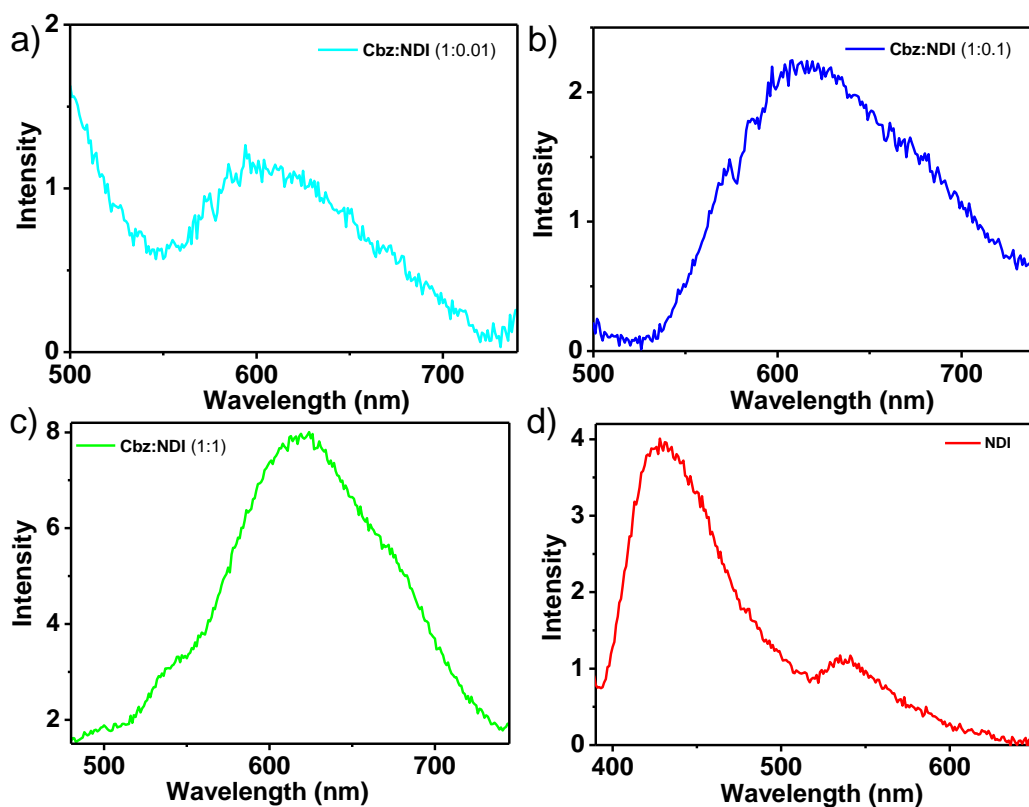

**Figure S13.** Phosphorescence spectra of **Cbz:NDI** with varying ratios a) 1:0.01, b) 1:0.1, c) 1: 1 and d) **NDI** in neat liquid thin film 25 °C in air ( $\lambda_{\text{ex}} = 350$  nm).

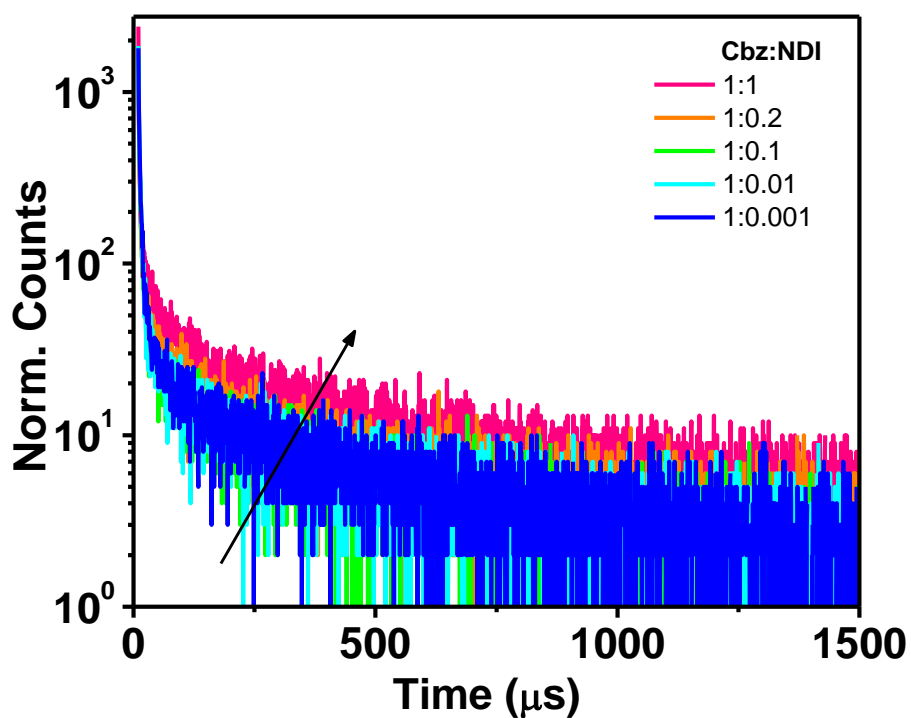

**Figure S14.** Variation of emission lifetime of RTPL emission of **Cbz:NDI** with an increasing equivalence of **NDI** in the neat liquid thin film ( $\lambda_{\text{ex}} = 374$  nm,  $\lambda_{\text{mon}} = 620$  nm).

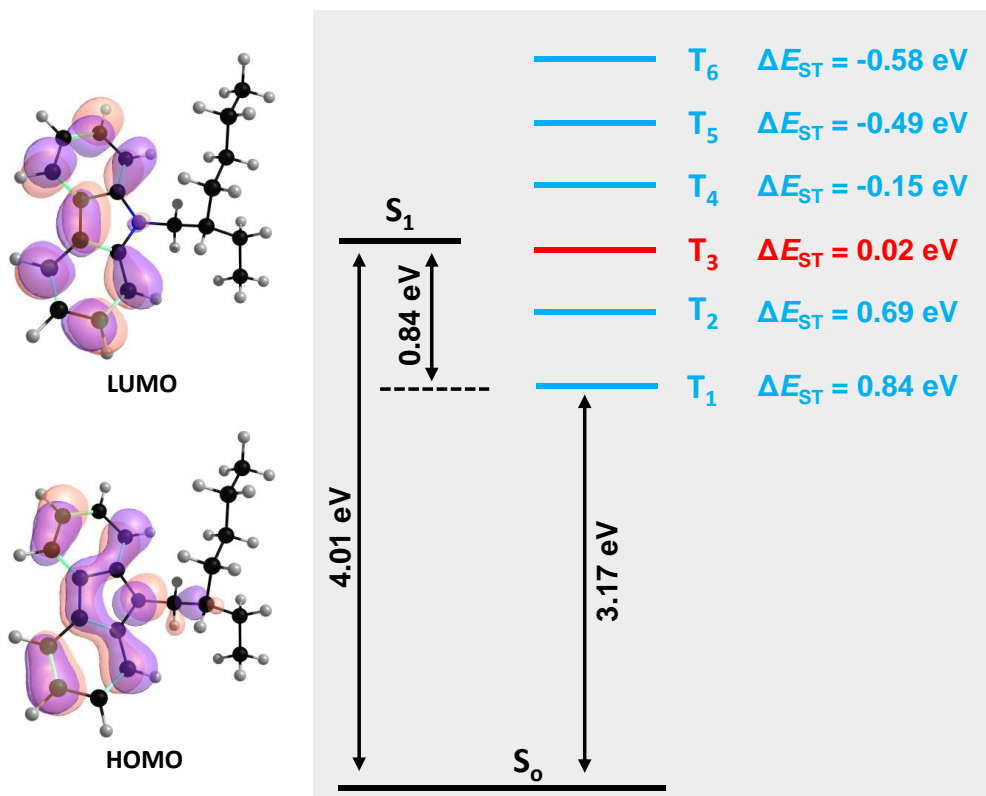

**Figure S15.** HOMO and LUMO of **Cbz** along with energy level diagram showing  $\Delta E_{ST}$  from DFT calculations.

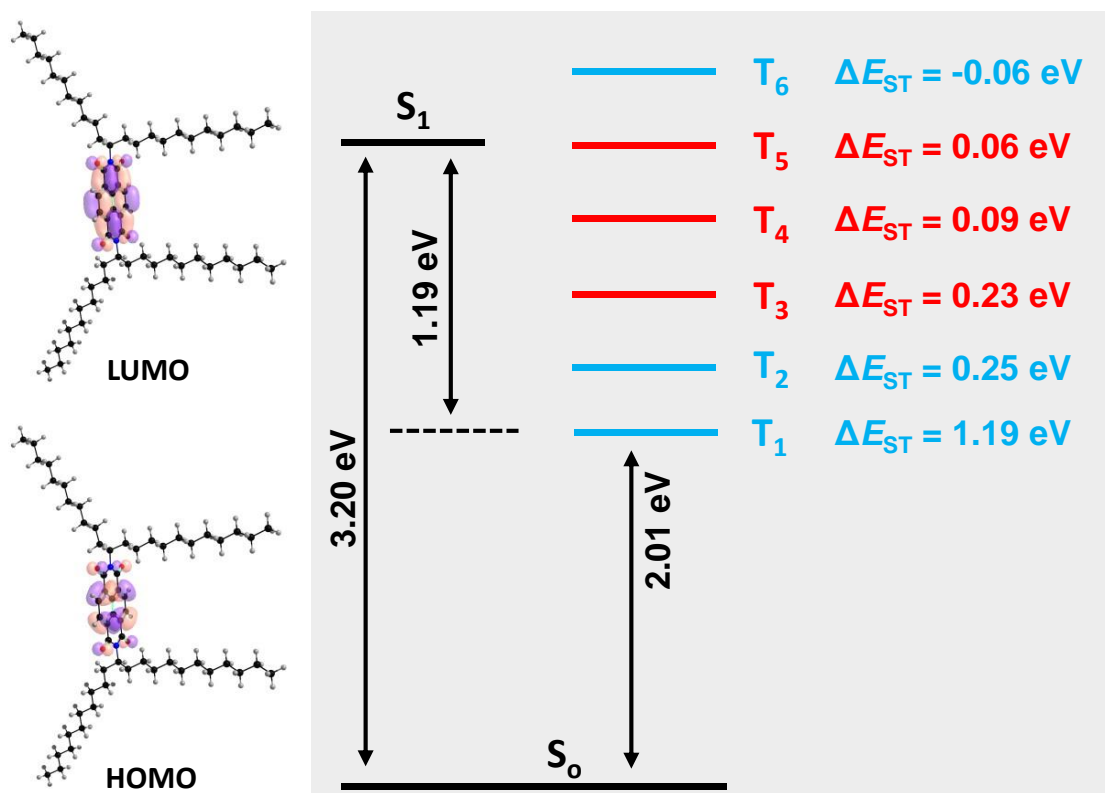

**Figure S16.** HOMO and LUMO of **NDI** along with energy level diagram showing  $\Delta E_{ST}$  from DFT calculations.

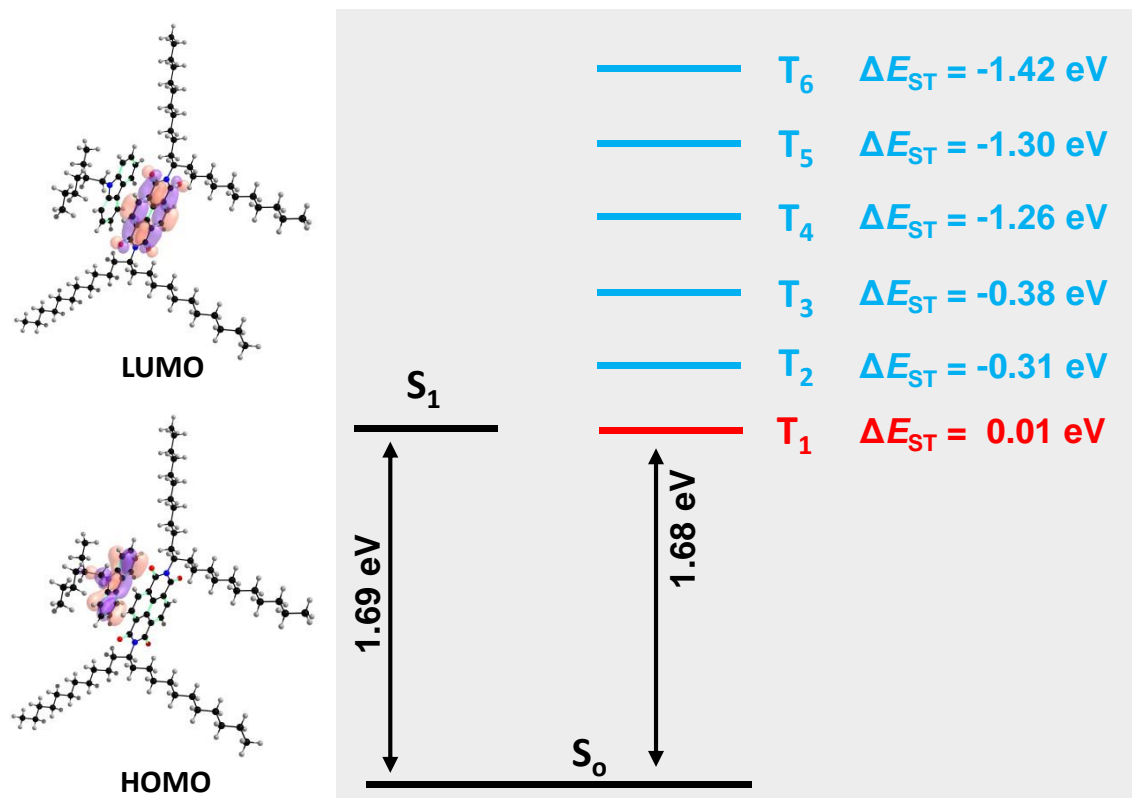

**Figure S17.** HOMO and LUMO of **Cbz:NDI** along with energy level diagram showing  $\Delta E_{ST}$  from DFT calculations.

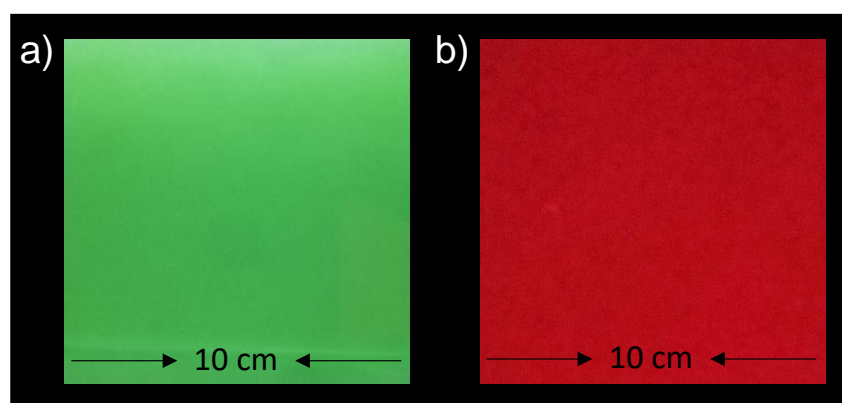

**Figure S18.** Photographs of a) **Cbz:NMI** (1:1) and b) **Cbz:NDI** (1:1) coated on glass (10x10 cm) under UV light (365 nm).

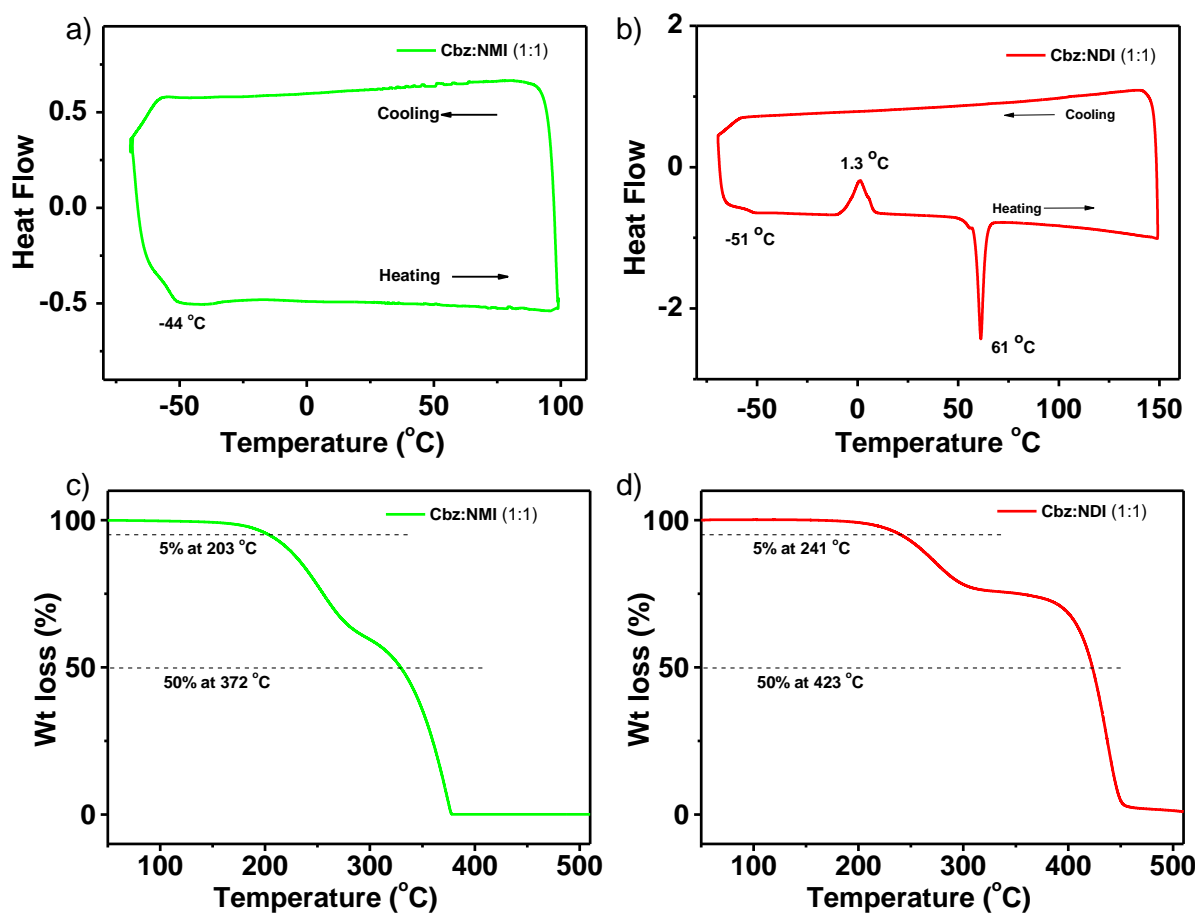

**Figure S19.** DSC thermograms in the heating trace at a scanning rate of 10 °C/min of a) **Cbz:NMI (1:1)**, b) **Cbz:NDI (1:1)**, and TGA of c) **Cbz:NMI (1:1)**, d) **Cbz:NDI (1:1)**.

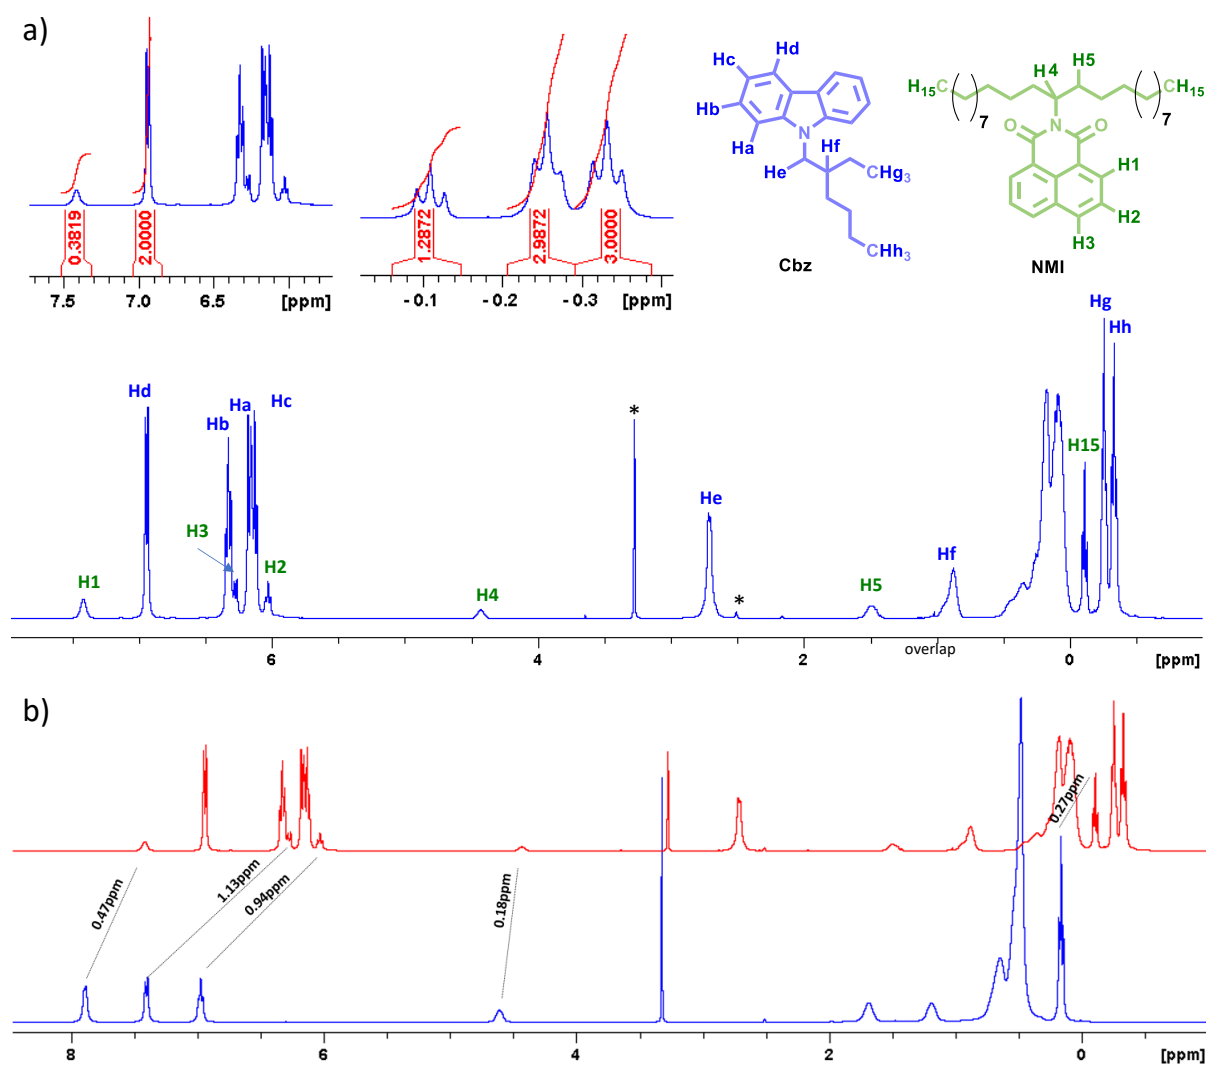

**Figure S20.** Chemical structures of **Cbz** and **NMI** with labelled protons and  $^1\text{H}$  NMR spectrum of a) **Cbz:NMI** in the neat liquid at 318 K. Signal integration gives an estimate of the ratio, **Cbz:NMI** = 1:0.2. Asterisks indicate signals from the external lock solvent DMSO and residual water. b) Stack of **NMI** (blue) and **Cbz:NMI** (red) in the neat form at 318 K. Upfield shifts of **NMI** protons are indicated.

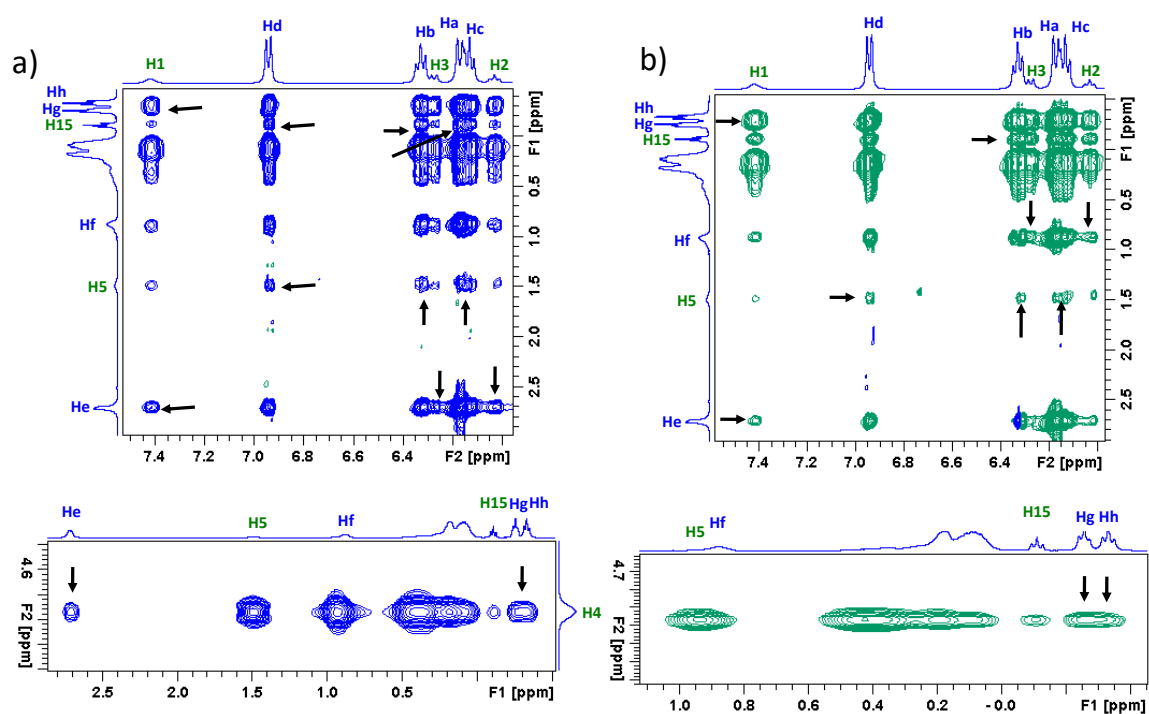

**Figure S21.** a) NOESY and b) ROESY spectra of **Cbz:NMI** (1:0.2) at 250 and 100 ms respectively, recorded at 318 K. Intermolecular cross-peaks are indicated by arrows.

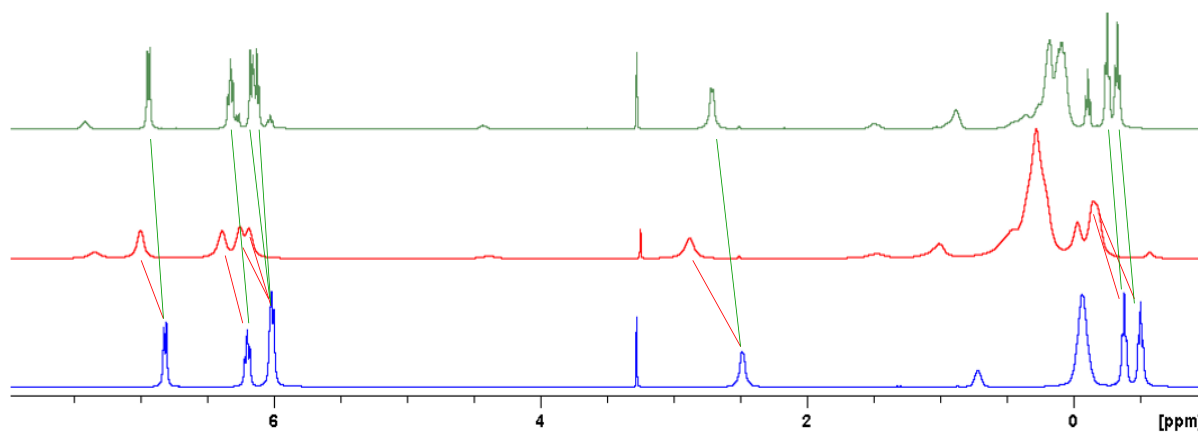

**Figure S22.**  $^1\text{H}$  NMR spectra of **Cbz** (blue), **Cbz:NDI** (red) and **Cbz:NMI** (green) in the neat liquid at 318 K. Downfield shifts of **Cbz** protons in the complexes are indicated.

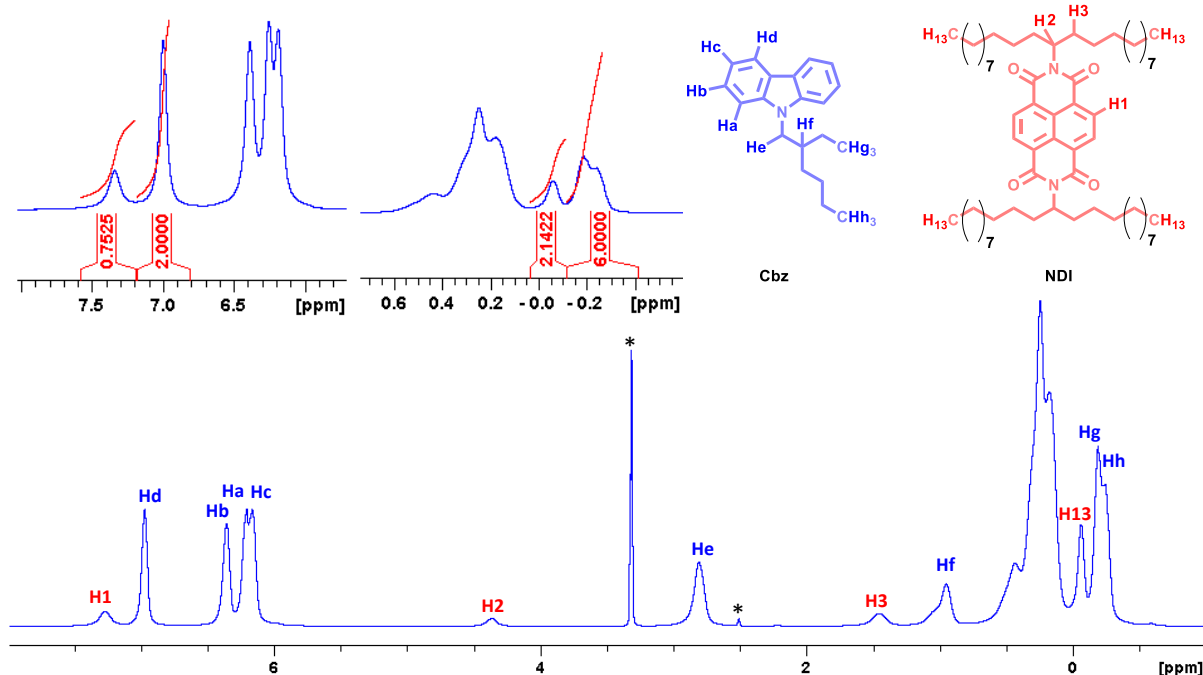

**Figure S23.** Chemical structures of **Cbz** and **NDI** with labelled protons and  $^1\text{H}$  NMR spectrum of **Cbz:NDI** in the neat liquid at 318 K. Signal integration gives an estimate of the ratio, **Cbz:NDI** = 1:0.2. Asterisks indicate signals from the external lock solvent DMSO and residual water.

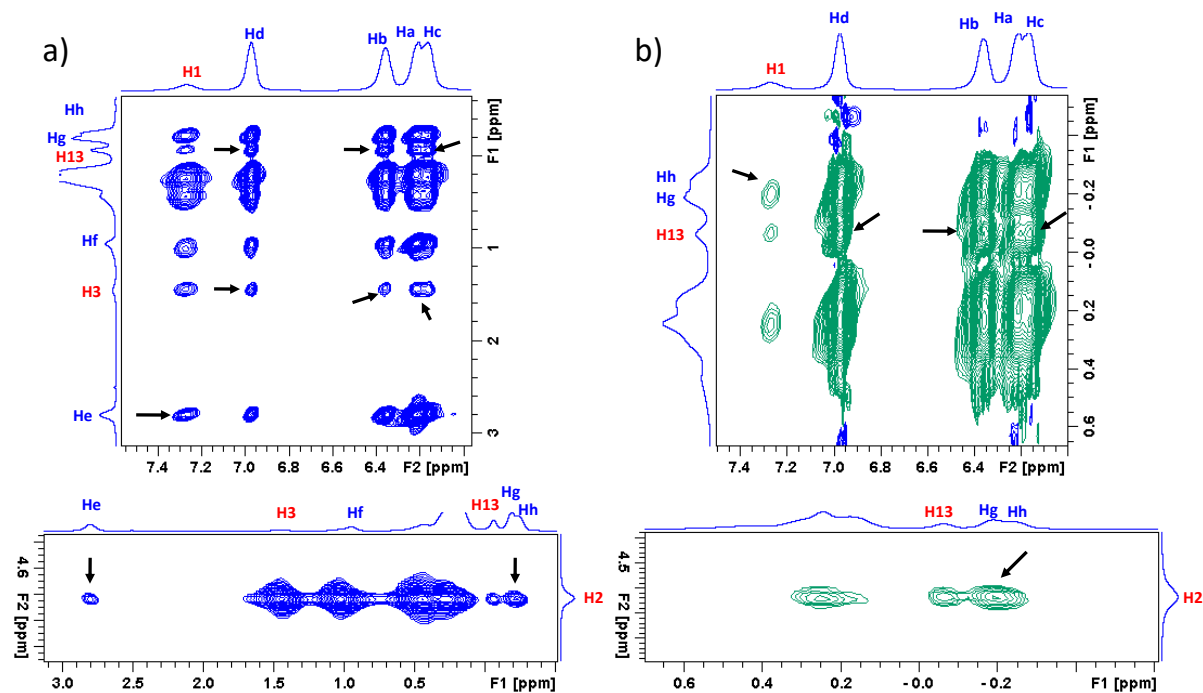

**Figure S24.** a) NOESY and b) ROESY spectra of **Cbz:NDI** (1:0.2) at 250 and 100 ms respectively, recorded at 318 K. Intermolecular cross-peaks are indicated by arrows.

## Tables

**Table S1.** Emission lifetime of **Cbz**, **NMI** and **NDI** in dichloromethane ( $C = 0.01$  mM,  $l = 1$  mm,  $\lambda_{\text{ex}} = 374$  nm).

| <b>Trials</b> | <b>Compounds</b> | <b>Wavelength monitored (nm)</b> | <b>Lifetime</b>                                                                     | <b>CHISQ (<math>\chi^2</math>) values</b> |
|---------------|------------------|----------------------------------|-------------------------------------------------------------------------------------|-------------------------------------------|
| 1             | <b>Cbz</b>       | 390                              | $\tau_1 = 0.02$ ns (34 %)<br>$\tau_2 = 0.94$ ns (48 %)<br>$\tau_3 = 8.48$ ns (18 %) | 1.16                                      |
| 2             | <b>NMI</b>       | 410                              | $\tau_1 = 0.95$ ns (8 %)<br>$\tau_2 = 6.04$ ns (92 %)                               | 1.03                                      |
| 3             | <b>NDI</b>       | 412                              | $\tau_1 = 0.89$ ns (86 %)<br>$\tau_2 = 2.45$ ns (14 %)                              | 1.14                                      |

**Table S2.** Emission lifetime of **Cbz**, **NMI**, and **NDI** in neat liquid thin-film ( $\lambda_{\text{ex}} = 374$  nm).

| <b>Trials</b> | <b>Compounds</b> | <b>Wavelength monitored (nm)</b> | <b>Lifetime</b>                                                                   | <b>CHISQ (<math>\chi^2</math>) values</b> |
|---------------|------------------|----------------------------------|-----------------------------------------------------------------------------------|-------------------------------------------|
| 1             | <b>Cbz</b>       | 410                              | $\tau_1 = 0.01$ ns (09%)<br>$\tau_2 = 7.58$ ns (91 %)                             | 0.98                                      |
| 2             | <b>NMI</b>       | 468                              | $\tau_1 = 0.04$ ns (53 %)<br>$\tau_2 = 1.30$ ns (10%)<br>$\tau_3 = 13.7$ ns (37%) | 1.21                                      |
| 3             | <b>NDI</b>       | 490                              | $\tau_1 = 0.06$ ns (25%)<br>$\tau_2 = 8.43$ ns (75%)                              | 1.19                                      |

**Table S3.** Emission quantum yield of **Cbz**, **NMI**, **NDI**, **Cbz:NMI (1:1)**, and **Cbz:NDI (1:1)** in solution and neat liquid.<sup>S4</sup>

| Compounds            | Quantum Yield (%) |             |
|----------------------|-------------------|-------------|
|                      | Solution          | Neat liquid |
| <b>Cbz</b>           | 3.60%             | 11.34%      |
| <b>NMI</b>           | 0.53 %            | 4.83%       |
| <b>NDI</b>           | 0.25 %            | 1.44%       |
| <b>Cbz:NMI (1:1)</b> | 2.38 %            | 7.05%       |
| <b>Cbz:NDI (1:1)</b> | 1.38 %            | 2.37%       |

**Table S4.** Variation of emission lifetime of **Cbz:NMI** with an increasing equivalence of **NMI** in the neat liquid thin film ( $\lambda_{\text{ex}} = 374$  nm,  $\lambda_{\text{mon}} = 495$  nm).

| Trials | Cbz:NMI | Lifetime (ns)                                                           | CHISQ ( $\chi^2$ ) values |
|--------|---------|-------------------------------------------------------------------------|---------------------------|
| 1      | 1:0.001 | $\tau_1 = 0.02$ (28%)<br>$\tau_2 = 2.68$ (14%)<br>$\tau_3 = 16.6$ (58%) | 1.25                      |
| 2      | 1:0.01  | $\tau_1 = 0.04$ (38%)<br>$\tau_2 = 2.85$ (14%)<br>$\tau_3 = 18.0$ (48%) | 1.16                      |
| 3      | 1:0.1   | $\tau_1 = 0.04$ (45%)<br>$\tau_2 = 4.31$ (12%)<br>$\tau_3 = 21.6$ (43%) | 1.16                      |
| 4      | 1:0.2   | $\tau_1 = 0.09$ (04%)<br>$\tau_2 = 5.82$ (30%)<br>$\tau_3 = 22.5$ (66%) | 1.04                      |
| 5      | 1:1     | $\tau_1 = 2.18$ (07%)<br>$\tau_2 = 10.0$ (42%)<br>$\tau_3 = 26.0$ (51%) | 1.11                      |

**Table S5.** Variation of emission lifetime of RTPL emission of **Cbz:NDI** with an increasing equivalence of **NDI** in the neat liquid thin film ( $\lambda_{\text{ex}} = 374$  nm,  $\lambda_{\text{mon}} = 620$  nm).

| <b>Trials</b> | <b>Cbz:NDI</b> | <b>Lifetime (<math>\mu\text{s}</math>)</b>                             | <b>CHISQ (<math>\chi^2</math>) values</b> |
|---------------|----------------|------------------------------------------------------------------------|-------------------------------------------|
| 1             | 1:0.001        | $\tau_1 = 2.07$ (30%)<br>$\tau_3 = 21.9$ (17%)<br>$\tau_2 = 326$ (53%) | 1.22                                      |
| 2             | 1:0.01         | $\tau_1 = 2.16$ (30%)<br>$\tau_3 = 24.2$ (18%)<br>$\tau_2 = 391$ (52%) | 1.10                                      |
| 3             | 1:0.1          | $\tau_1 = 1.57$ (19%)<br>$\tau_2 = 29.0$ (19%)<br>$\tau_3 = 410$ (62%) | 1.12                                      |
| 4             | 1:0.2          | $\tau_1 = 2.44$ (33%)<br>$\tau_3 = 42.3$ (17%)<br>$\tau_2 = 434$ (50%) | 1.11                                      |
| 5             | 1:1            | $\tau_1 = 1.05$ (12%)<br>$\tau_2 = 31.4$ (18%)<br>$\tau_3 = 485$ (70%) | 1.01                                      |

## Details of DFT calculations

Ground ( $S_0$ ) state calculations were performed using restricted density functional theory (DFT). Singlet and triplet excited states were investigated using time-dependent density functional theory (TDDFT). The ground state singlet ( $S_0$ ) state was calculated using B3LYP/6-31G(d) level of theory. Also the TDDFT calculations were done with same level of theory. All the geometries of the complexes in the  $S_0$  state were optimized. The optimized Cartesian coordinates and total energies are listed below. On the basis of the Frank-Condon principle, the absorption properties were evaluated using the optimized  $S_0$  state structure. The Gaussian09<sup>S5</sup> software was used in all the DFT and TDDFT calculations.

## Optimized Cartesian coordinates of different complexes ( $S_0$ state) at the B3LYP/6-31G(d) level of theory.

### Cbz

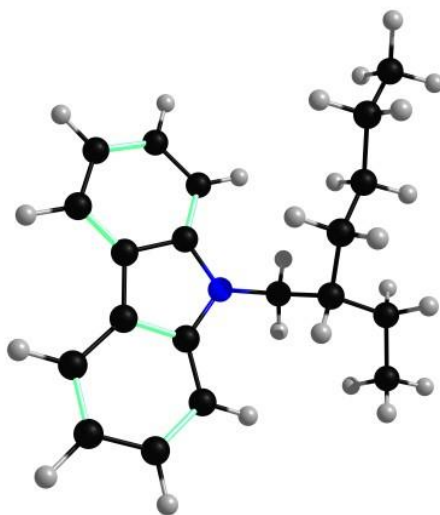

**Table S6.  $\pi$ - $\pi^*$  Excitation properties of Cbz calculated at the TD-B3LYP/6-31G(d) level**

|         | $\Delta E$ (eV) | $\lambda$ (nm) | $f$    | Configuration<br>(orbital symmetry) | Coefficient |
|---------|-----------------|----------------|--------|-------------------------------------|-------------|
| S0 _ S1 | 4.0079          | 309.35         | 0.0371 | HOMO (76) _ LUMO (77)               | 0.68097     |
| S0 _ S2 | 4.5139          | 274.67         | 0.0772 | HOMO-1 (75)_LUMO (77)               | 0.58613     |
| S0 _ S3 | 5.2125          | 237.86         | 0.4419 | HOMO (76)_LUMO+1 (78)               | 0.53357     |
| S0 _ S4 | 5.3279          | 232.71         | 0.0209 | HOMO-1 (75)_LUMO+1 (78)             | 0.57355     |
| S0 _ S5 | 5.4281          | 228.41         | 0.1577 | HOMO-2 (74)_LUMO (77)               | 0.58559     |
| S0 _ S6 | 5.8230          | 212.92         | 0.1809 | HOMO (76)_LUMO+2 (79)               | 0.1809      |
| S0 _ S7 | 5.9311          | 209.04         | 0.3967 | HOMO (76)_LUMO+3(80)                | 0.55531     |

|          |        |        |        |                         |         |
|----------|--------|--------|--------|-------------------------|---------|
| S0 _ S8  | 6.2123 | 199.58 | 0.0711 | HOMO-1 (75)_LUMO+3(80)  | 0.39414 |
| S0 _ S9  | 6.2588 | 198.10 | 0.0428 | HOMO-1 (75)_LUMO+2 (79) | 0.42909 |
| S0 _ S10 | 6.3991 | 193.75 | 0.0163 | HOMO-2 (74)_LUMO+1 (78) | 0.52360 |

|          | $\Delta E$ (eV) | $\lambda$ (nm) | $f$    | <b>Configuration<br/>(orbital symmetry)</b> | <b>Coefficient</b> |
|----------|-----------------|----------------|--------|---------------------------------------------|--------------------|
| S0 _ T1  | 3.1710          | 390.99         | 0.0000 | HOMO-1 (75) _ LUMO (77)                     | 0.60607            |
| S0 _ T2  | 3.3183          | 3.3183         | 0.0000 | HOMO (76)_LUMO (77)                         | 0.68280            |
| S0 _ T3  | 3.9901          | 310.73         | 0.0000 | HOMO (76)_LUMO+1 (78)                       | 0.55781            |
| S0 _ T4  | 4.1608          | 297.98         | 0.0000 | HOMO (76)_LUMO+3 (79)                       | 0.47200            |
| S0 _ T5  | 4.5037          | 275.30         | 0.0000 | HOMO-1 (75)_LUMO+1 (78)                     | 0.64650            |
| S0 _ T6  | 4.5868          | 270.31         | 0.0000 | HOMO-2 (74)_LUMO (77)                       | 0.53909            |
| S0 _ T7  | 4.8498          | 255.65         | 0.0000 | HOMO (76)_LUMO+2 (79)                       | 0.40726            |
| S0 _ T8  | 5.1541          | 240.56         | 0.0000 | HOMO-1(75)_LUMO+2 (79)                      | 0.62672            |
| S0 _ T9  | 5.4074          | 229.29         | 0.0000 | HOMO (76)_LUMO+3 (80)                       | 0.59749            |
| S0 _ T10 | 5.6244          | 220.44         | 0.0000 | HOMO-2(74)_LUMO+1 (78)                      | 0.55549            |

# NDI

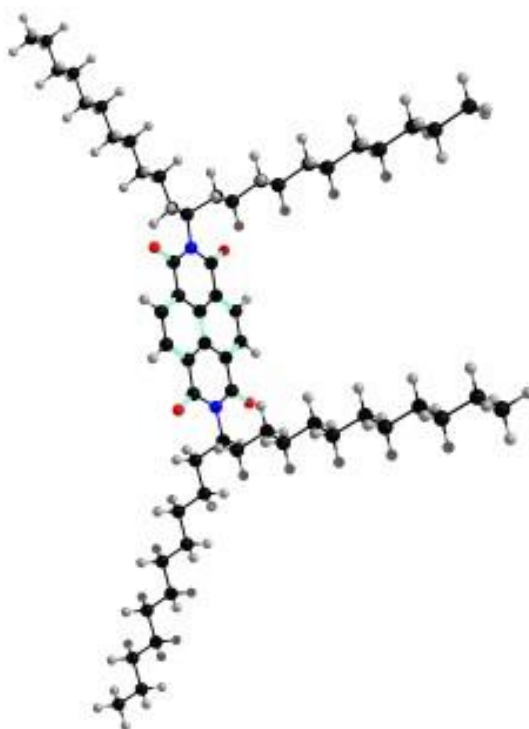

**Table S7.  $\pi$ - $\pi^*$  Excitation properties of NDI calculated at the TD-B3LYP/6-31G(d) level**

|          | $\Delta E$ (eV) | $\lambda$ (nm) | $f$    | Configuration<br>(orbital symmetry) | Coefficient |
|----------|-----------------|----------------|--------|-------------------------------------|-------------|
| S0 _ S1  | 3.2081          | 386.47         | 0.0008 | HOMO (250) _ LUMO (253)             | 0.65258     |
| S0 _ S2  | 3.3578          | 369.24         | 0.3956 | HOMO (252) _ LUMO (253)             | 0.69924     |
| S0 _ S3  | 3.3693          | 367.98         | 0.0001 | HOMO (248) _ LUMO (253)             | 0.68979     |
| S0 _ S4  | 3.4280          | 361.68         | 0.0002 | HOMO (247) _ LUMO (253)             | 0.66751     |
| S0 _ S5  | 3.5371          | 350.53         | 0.0000 | HOMO (251) _ LUMO (253)             | 0.62916     |
| S0 _ S6  | 3.5724          | 347.06         | 0.0000 | HOMO (249) _ LUMO (253)             | 0.67813     |
| S0 _ S7  | 3.6119          | 343.27         | 0.0001 | HOMO (245) _ LUMO (253)             | 0.65995     |
| S0 _ S8  | 3.9095          | 317.13         | 0.0753 | HOMO (246) _ LUMO (253)             | 0.63910     |
| S0 _ S9  | 4.2670          | 290.57         | 0.0000 | HOMO (244) _ LUMO (253)             | 0.67794     |
| S0 _ S10 | 4.2741          | 290.09         | 0.0069 | HOMO (243) _ LUMO (253)             | 0.65370     |

|         | $\Delta E$ (eV) | $\lambda$ (nm) | $f$    | Configuration<br>(orbital symmetry) | Coefficient |
|---------|-----------------|----------------|--------|-------------------------------------|-------------|
| S0 _ T1 | 2.0136          | 615.72         | 0.0000 | HOMO (252) _ LUMO (253)             | 0.69372     |

|          |        |        |        |                         |         |
|----------|--------|--------|--------|-------------------------|---------|
| S0 _ T2  | 2.9535 | 419.79 | 0.0000 | HOMO (251) _ LUMO (253) | 0.60324 |
| S0 _ T3  | 2.9758 | 416.64 | 0.0000 | HOMO (250) _ LUMO (253) | 0.66972 |
| S0 _ T4  | 3.1165 | 397.83 | 0.0000 | HOMO (248) _ LUMO (253) | 0.65445 |
| S0 _ T5  | 3.1408 | 394.75 | 0.0000 | HOMO (249) _ LUMO (253) | 0.61594 |
| S0 _ T6  | 3.2087 | 386.40 | 0.0000 | HOMO (247) _ LUMO (253) | 0.66218 |
| S0 _ T7  | 3.2571 | 380.66 | 0.0000 | HOMO (246) _ LUMO (253) | 0.56540 |
| S0 _ T8  | 3.3737 | 367.50 | 0.0000 | HOMO (245) _ LUMO (253) | 0.63956 |
| S0 _ T9  | 3.4467 | 359.72 | 0.0000 | HOMO (252) _ LUMO (254) | 0.43604 |
| S0 _ T10 | 4.2079 | 294.65 | 0.0000 | HOMO (243) _ LUMO (253) | 0.52034 |

### Cbz:NDI

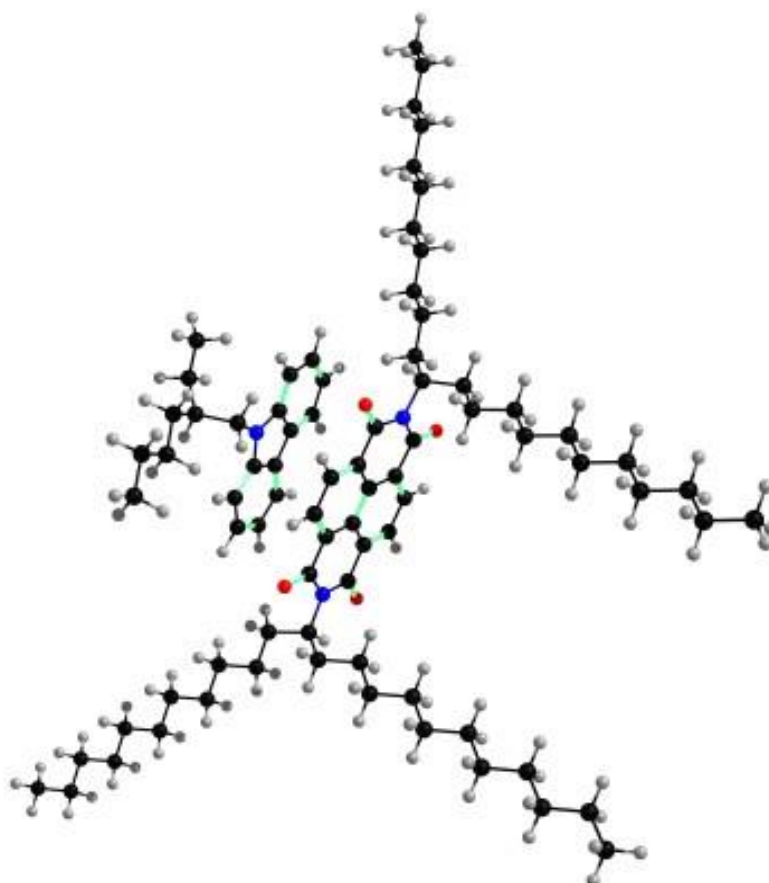

**Table S8.  $\pi$ - $\pi^*$  Excitation properties of Cbz:NDI calculated at the TD-B3LYP/6-31G(d) level**

|  | $\Delta E$ (eV) | $\lambda$ (nm) | $f$ | Configuration<br>(orbital symmetry) | Coefficient |
|--|-----------------|----------------|-----|-------------------------------------|-------------|
|--|-----------------|----------------|-----|-------------------------------------|-------------|

|          |        |        |        |                           |         |
|----------|--------|--------|--------|---------------------------|---------|
| S0 _ S1  | 1.6934 | 732.17 | 0.0006 | HOMO (328) _ LUMO (329)   | 0.70678 |
| S0 _ S2  | 2.0739 | 597.82 | 0.0007 | HOMO-1 (327) _ LUMO (329) | 0.70689 |
| S0 _ S3  | 3.1019 | 399.70 | 0.0218 | HOMO-2 (326) _ LUMO (329) | 0.53696 |
| S0 _ S4  | 3.2229 | 384.69 | 0.0001 | HOMO-5 (323) _ LUMO (329) | 0.68545 |
| S0 _ S5  | 3.3486 | 370.26 | 0.2472 | HOMO-3 (325) _ LUMO (329) | 0.51994 |
| S0 _ S6  | 3.3863 | 366.14 | 0.0153 | HOMO-7 (321) _ LUMO (329) | 0.66635 |
| S0 _ S7  | 3.4446 | 359.93 | 0.0014 | HOMO-8 (320) _ LUMO (329) | 0.54382 |
| S0 _ S8  | 3.4471 | 359.68 | 0.0004 | HOMO (328) _ LUMO+1 (330) | 0.61341 |
| S0 _ S9  | 3.5389 | 350.35 | 0.0002 | HOMO-4 (324) _ LUMO (329) | 0.63220 |
| S0 _ S10 | 3.5937 | 345.00 | 0.0004 | HOMO-6 (322) _ LUMO (329) | 0.66284 |

|          | $\Delta E$ (eV) | $\lambda$ (nm) | $f$    | Configuration<br>(orbital symmetry) | Coefficient |
|----------|-----------------|----------------|--------|-------------------------------------|-------------|
| S0 _ T1  | 1.6848          | 735.90         | 0.0000 | HOMO (328) _ LUMO (329)             | 0.70172     |
| S0 _ T2  | 2.0032          | 618.94         | 0.0000 | HOMO-2 (326) _ LUMO (329)           | 0.58339     |
| S0 _ T3  | 2.0742          | 597.75         | 0.0000 | HOMO-1 (327) _ LUMO (329)           | 0.69333     |
| S0 _ T4  | 2.9534          | 419.80         | 0.0000 | HOMO-4 (324) _ LUMO (329)           | 0.57144     |
| S0 _ T5  | 2.9896          | 414.71         | 0.0000 | HOMO-5 (323) _ LUMO (329)           | 0.65839     |
| S0 _ T6  | 3.1151          | 398.01         | 0.0000 | HOMO-3 (325) _ LUMO (329)           | 0.55109     |
| S0 _ T7  | 3.1338          | 395.64         | 0.0000 | HOMO-7 (321) _ LUMO (329)           | 0.65152     |
| S0 _ T8  | 3.1570          | 392.73         | 0.0000 | HOMO-6 (322) _ LUMO (329)           | 0.56033     |
| S0 _ T9  | 3.1708          | 391.02         | 0.0000 | HOMO-1 (327) _ LUMO+4 (333)         | 0.52731     |
| S0 _ T10 | 3.2309          | 383.75         | 0.0000 | HOMO-8 (320) _ LUMO (329)           | 0.65055     |

## References

- S1. Justyniarski, A.; Zaręba, J. K.; Hańczyc, P.; Fita, P.; Chołuj, M.; Zaleśny, R.; Samoc, M.; *J. Mater. Chem. C*, **2018**, *6*, 4384.
- S2. Wakchaure, V. C.; Goudappagouda, Das, T.; Ravindranathan, S.; Babu, S. S., *Nanoscale*, **2021**, *13*, 10780-10784.
- S3. Wakchaure, V. C.; Pillai, L. V.; Goudappagouda, Ranjeesh, K. C.; Chakrabarty, S.; Ravindranathan, S.; Rajamohanan, P. R., Babu, S. S., *Chem. Commun.*, **2019**, *55*, 9371-9374.
- S4. a) Goudappagouda, A. Manthanath, V. C. Wakchaure, K. C. Ranjeesh, T. Das, K. Vanka, T. Nakanishi, S. S. Babu, *Angew. Chem., Int. Ed.*, **2019**, *58*, 2284-2288; b) M. Komura, T. Ogawa, Y. Tani, *Chem. Sci.*, **2021**, *12*, 14363-14368.
- S5. Gaussian 09, Revision E.01; M. J. Frisch, G. W. Trucks, H. B. Schlegel, G. E. Scuseria, M. A. Robb, J. R. Cheeseman, G. Scalmani, V. Barone, B. Mennucci, G. A. Petersson, H. Nakatsuji, M. Caricato, X. Li, H. P. Hratchian, A. F. Izmaylov, J. Bloino, G. Zheng, J. L. Sonnenberg, M. Hada, M. Ehara, K. Toyota, R. Fukuda, J. Hasegawa, M. Ishida, T. Nakajima, Y. Honda, O. Kitao, H. Nakai, T. Vreven, J. A. Montgomery, Jr., J. E. Peralta, F. Ogliaro, M. Bearpark, J. J. E. Heyd, K. N. B. Kudin, V. N. Staroverov, R. Kobayashi, J. K. Raghavachari, A. Rendell, J. C. Burant, S. S. Iyengar, J. Tomasi, M. Cossi, N. Rega, J. M. Millam, M. Klene, J. E. Knox, J. B. Cross, V. Bakken, C. Adamo, J. Jaramillo, R. Gomperts, R. E. Stratmann, O. Yazyev, A. J. Austin, R. Cammi, C. Pomelli, J. W. Ochterski, R. L. Martin, K. Morokuma, V. G. Zakrzewski, G. A. Voth, P. Salvador, J. J. Dannenberg, S. Dapprich, A. D. Daniels, Ö. Farkas, J. B. Foresman, J. V. Ortiz, J. Cioslowski, D. J. Fox, Gaussian, Inc., Wallingford CT, **2009**.
